1 **The Ras family members follow the blood progesterone level during formation and regression in bovine corpus**  
2 **luteum**

3  
4 Sang-Hee Lee<sup>1,2</sup>, Seunghyung Lee<sup>3,\*</sup>

5  
6 <sup>1</sup>Discipline of ICT, School of Technology, Environments and Design, University of Tasmania, Hobart, Australia

7  
8 <sup>2</sup>Institute of Animal Resources, Kangwon National University, Chuncheon, Republic of Korea

9  
10 <sup>3</sup>College of Animal Life Sciences, Kangwon National University, Chuncheon, Republic of Korea

11  
12 \* Corresponding author

13 E-mail: s.lee@kangwon.ac.kr

14  
15 Running Head: Ras family members in corpus luteum

16  
17  
18  
19 This document certifies that the manuscript listed below was edited for proper English language, grammar,  
20 punctuation, spelling, and overall style by one or more of the highly qualified native English speaking editors at  
21 American Journal Experts (Verification Key No: 4A04-0DC7-76BA-A4B0-BEC9).

38 **Abstract**

39  
40 Ras family members regulate cellular differentiation, proliferation and survival. CL formation and regression are  
41 regulated by the blood P4 level. This study investigated the association between changes in Ras family members and  
42 the serum P4 level and determined protein interactions among Ras family members, hormone receptors, and  
43 angiogenetic and apoptotic factors during formation and regression of the bovine CL. RASAL3 and RASA3 were found  
44 using proteomics in CL and were significantly increased in the SPCL compared to the PPCL, whereas RasGEF1B was  
45 decreased in the PPCL. Hormone receptors and angiogenetic proteins expression was lower in the PPCL and SPCL than  
46 that in the RPCL, but apoptotic proteins were increased in the RPCL. The P4 and estrogen receptors positive correlated  
47 with RasGEF1B, R-Ras, and H-Ras through VEGFA, VEGFR2 and Tie2 in STRING database. RasGAP, H-Ras and R-  
48 Ras protein expression was increased in the PPCL compared to that in the SPCL, whereas RasGEF expression was  
49 decreased. In summary, Ras activation and angiogenesis in the CL were positively correlated with the blood P4 during  
50 estrous cycle. These results may increase understanding of Ras biological functions following stimulation of hormones  
51 and their receptors during tissue proliferation and degeneration.

52  
53 Key words: Progesterone, Ras, Angiogenesis, Apoptosis, Corpus luteum  
54  
55  
56  
57  
58  
59  
60  
61  
62  
63  
64  
65  
66  
67  
68  
69  
70  
71  
72  
73  
74

## 75 Introduction

76  
77 The corpus luteum (CL) is a transient endocrine gland in the female reproductive tract that produces progesterone  
78 (P4), which is required to maintain pregnancy for the beginning of life in mammals (1). During CL formation, granulosa  
79 and theca cells in the ovary are differentiated and proliferate into steroidogenic luteal cells (LSCs) in response to  
80 luteinizing hormone (LH) until day 8 to 9 after ovulation. Then, the CL weight increases three to four times when its  
81 growth is complete prior to the next round of ovulation (2). LSCs produce P4 that is secreted into the blood vessels,  
82 which contribute to the maintenance of pregnancy (3-5). However, if the pregnancy is not established, the CL begins to  
83 regress in response to prostaglandin F2 alpha (PGF2 $\alpha$ ) derived from the endometrium in a process termed luteolysis (6).  
84 The formation and regression of the CL are repeated, and this repetition by sex hormones distinguishes it from other  
85 mammalian tissues (6). For several decades, studies have mainly investigated the formation and regression of  
86 gonadotropin release hormone (GnRH) and steroidogenic hormones, whereas few studies have investigated the roles of  
87 small GTPases in formation and regression of the CL.

88 During the proliferation phase (PP), luteal endothelial cells (LECs) proliferate following interaction with vascular  
89 endothelial growth factor A (VEGFA) and VEGF receptor 2 (VEGFR2) to generate blood vessels and support LSC  
90 proliferation in the CL (7, 8). After vasculature is stabilized by the balance of angiopoietin 1 (Ang1) and Tie2 (9). When  
91 the CL is completely developed, P4 is converted from pregnenolone by 3 $\beta$ -hydroxysteroid dehydrogenase (3 $\beta$ -HSD)  
92 continuously during a phase that is called the secretion phase (SP) (6). If implantation is successful, maternal recognition  
93 should inhibit PGF2 $\alpha$  synthesis in the endometrium, and then the CL consistently produces and secretes P4 to maintain  
94 the pregnancy (10). However, synthesized PGF2 $\alpha$  from the endometrium is transported through blood vessels and  
95 triggers CL regression when the endometrium does not recognize maternal processes; thus, the purpose of luteolysis  
96 induced by PGF2 $\alpha$  is to prepare for a new estrous cycle (3, 11). During luteolysis as a regression phase (RP),  
97 representative cell death signals, tumor necrosis factor (TNF), and FasL and its receptors are activated. The P4  
98 concentration dramatically increases, and the PGF2 $\alpha$  concentration increases in the blood and CL (12). Therefore, the  
99 blood P4 and PGF2 $\alpha$  concentrations are key points for the proliferation, angiogenesis, and apoptosis of luteal cells.

100 Small G proteins are typically between 20 and 30 kDa in size and cycle between an inactive guanosine  
101 diphosphate (GDP)-bound conformation and an active guanosine triphosphate (GTP)-bound conformation that act as  
102 molecular switches to regulate broad cellular processes, including proliferation, differentiation, adhesion, survival, and  
103 apoptosis (13). The GDP- and GTP-conformation cycle is regulated by guanine nucleotide exchange factors (GEFs),  
104 which induce the release of bound GDP and its replacement with GTP by GTPase-activating proteins (GAPs) that  
105 provide a catalytic group for GTP hydrolysis (13). The progenitor of the small G-protein family is Ras, which is mutated  
106 in 15% of human tumors. Ras consists of over 150 members that are classified into families and subfamilies based on  
107 sequence and functional similarities. The Ras superfamily is classified into five principal families (Ras, Rho, Rab, Arf,  
108 and Ran) (14). The Ras family members regulate various signaling pathways, including those involved in transcription,  
109 cellular differentiation and proliferation (13).

110 Although LSCs and LECs continually differentiate and proliferate and P4 gradually increases after ovulation  
111 during CL formation (7, 8), few studies has investigated the effect of Ras family members on differentiation and

112 proliferation or the relationship with the P4 concentration in CL during the estrous cycle (15, 16). Therefore, this study  
113 investigated the blood P4 level and discovered Ras regulator proteins during the estrous cycle in the bovine CL based  
114 on protein correlation. Then, to evaluate the association between Ras regulators and hormone receptors, protein-protein  
115 interactions among the discovered Ras regulators, hormone receptors, angiogenetic factors and apoptotic factors were  
116 analyzed using bioinformatics methods. Lastly, correlative relationships of mediator factors between Ras family  
117 members and hormone receptors were investigated, and their activation was comparatively analyzed with changes in  
118 the P4 concentration and tissue formation and regression during the estrous cycle.

## 120 **Materials and methods**

### 122 **Animals, progesterone levels in blood and sample preparation**

123 All procedures involving animals were approved by the Kangwon National University Institutional Animal Care  
124 and Use Committee (KIACUC-09-0139). Estrous synchronization and detection were performed as described  
125 previously (17). To induce estrous synchronization, exogenous progesterone source, Controlled Internal Drug Released  
126 dispenser (CIDR; Pfizer Animal Health, New York, NY, USA), was inserted in vagina, and GnRH (Pfizer) injected in  
127 cows ( $n = 10$ ). After 48 hours, CIDR was removed to regress P4 in blood, then PGF2 $\alpha$  was injected for CL regression  
128 and new estrous cycle. Estrous sign was observed at 36-48 hours after PGF2 $\alpha$  injection, this point was defined as the  
129 ovulation (Day 0). Blood was collected from jugular venipuncture using 15 mL vacutainer cleaned by heparin, between  
130 10:00 to 11:00 am at every 2 days from Day -2 to 24. Collected blood were centrifuged at 3,000 rpm for 15 min at 4°C,  
131 and serum was isolated and stored in -80 °C until the analysis. P4 levels were measured by ESLIA kit (Enzo Life Sciences,  
132 New York, NY, USA) according to the manufacturer's instructions. CL were collected from slaughtered heifers,  
133 transferred in laboratory within 2 hours at 4°C. Collected CL samples were classified according to three morphology  
134 such as 1-2 days (proliferation phase CL; PPCL;  $n = 15$ ), 12-15 days (secretion phase CL; SPCL;  $n = 20$ ) and 18-20  
135 days (regression phase CL; RPCL;  $n = 23$ ) after ovulation. Then, isolated CL tissues from ovary were measured weight  
136 and stored at -80°C until experiment.

### 138 **Hematoxylin and eosin staining**

139 Fixation and paraffin section of CL tissues were conducted according to previously methods (18). The fixed and  
140 paraffin embedded CL tissues were 4  $\mu$ m sections using a microtome. The paraffin sections were deparaffinized in  
141 xylene and rehydrated in ethanol (100%, 90%, 80%, and 70%) for 5 min. The CL tissue was blocked by immersing the  
142 slides in 3% BSA in PBS for 60 min and then washed with PBS for 5 min at room temperature (RT), then samples were  
143 stained in hematoxylin solution (Sigma, St Louis, MO, USA) for 5 min and washed with distilled water for 10 min,  
144 stained in EosinY solution (Sigma) for 1 min. Then samples were washed with distilled water, and dehydrated in ethanol  
145 (70%, 80%, 90% and 100%) and 100% xylene for 5 min per each step. The slides were mounted with Histomount  
146 Mounting Solution (Thermo Scientific, Waltham, MA, USA), then observed using Olympus BX50 microscope  
147 (Olympus, Tokyo, Japan).

## Two-dimensional gel electrophoresis (2-DE)

CL samples (PPCL,  $n = 4$ ; SPCL,  $n = 4$ ; RPCL,  $n = 4$ ) were selected from isolated CL tissues from ovaries according  $3\beta$ -HSD mRNA expression (Supplementary S1 Fig).  $3\beta$ -HSD expression means P4 production from CL because P4 is converted from pregnenolone by  $3\beta$ -HSD (1). CL samples were homogenized in M-PER mammalian Protein Extraction Reagent (Thermo Scientific) using tissue homogenizer (Bioneer, Daejeon, Korea), then incubated for 1 hour at RT, and centrifuged at 12,000 g for 10 min at 4 °C. The supernatant was transferred into a new micro-centrifuge tube, and protein concentration was determined by the BCA protein assay kit (Thermo Scientific). Interfered with substances such as detergents, salts, lipids, phenolics and nucleic acids in extracted protein were removed using the 2-D Clean-Up kit (GE Healthcare, Piscataway, NJ, USA) according to the manufacturer's instructions, and 700  $\mu$ g protein was dissolved in 300  $\mu$ L rehydration solution (GE Healthcare) for 1 hour at RT. Proteins into rehydration buffer were incubated with an 18 cm immobilized pH 3–11 nonlinear gradient dry strip (GE Healthcare) for 16 hours at 20°C. As described previously (19), isoelectric focusing (IEF) was performed for protein separation. IEF was performed at hold 500 V for 1 hour, gradient 1,000V 1hour, gradient 8,000 V for 3 hours, hold 8,000 V for 1.5 hours, gradient 10,000 V for 3 hours and hold 10,000 V for 1hour. Strips were then equilibrated for 15 min in 5 mL equilibration buffer (50 mM Tris-HCl, pH 8.8, 6.0 M urea, 30% glycerol (v/v), and 2% sodium dodecyl sulfate (w/v) containing 0.8 g dithiothreitol (Sigma), followed by an additional incubation for 15 min in 5 mL equilibration buffer containing 0.1 g iodoacetamide. Separation in the second dimension was accomplished using a 10% SDS-PAGE in a Protean II xi 2-D Cell (Bio-Rad, Hercules, CA, USA) at 50 mA until the bromophenol blue reached the bottom of the gel. Gels were stained in a solution of 0.1% Coomassie Brilliant Blue R-250 (Sigma) comprised of 45% methanol, 10% acetic acid and 45% water. Gels were then scanned using an image scanner and analyzed with ImageJ software (NCBI, USA). The SPCL and RPCL protein spots intensities were normalized to PPCL protein spots intensities for calculation of relative intensity.

## Matrix-assisted laser desorption/ionization time-of-flight mass spectrometry (MALDI-TOF/MS)

MALDI-TOF/MS was performed as described previously (19) and condition was listed in Supplementary Table 1. Spots were extracted from the gel and washed in 50% acetonitrile (ACN; Sigma) containing 25 mM  $\text{NH}_4$  bicarbonate, then incubated with 50% ACN containing 10 mM  $\text{NH}_4$  bicarbonate and 100% CAN. Finally, ACN in samples was removed using a speed vacuum. Then, samples were incubated with cold sequencing-grade modified trypsin (Promega, Madison, WI, USA) at 37°C for 20 h, followed by 50 min incubation with 50% ACN containing 5% trifluoroacetic acid (TFA) at RT. The supernatants were dried for peptide extraction using a speed vacuum, and then diluted with 50% ACN containing 5% TFA. Samples were desalted using a Zip-Tip C18 (Millipore, Milford, MA, USA). Plating was performed using a 4-hydroxy- $\alpha$ -cyano-cinnamic acid matrix solution (Sigma) on a MALDI-TOF/MS plate. Peptides were analyzed using an Ultraflex-TOF/TOF spectrometer (Bruker Daltonics, Hamburg, Germany) and MS-Fit software (<http://prospector.ucsf.edu>) and data were searched against UniProt database (<http://www.uniprot.org/>).

## Bioinformatics analysis

Ras regulator proteins of CL were analyzed to detection protein-protein interaction with  $\text{i}$ ) hormone receptors such as P4 receptor (P4R), PGF2 $\alpha$  receptor (PGF2 $\alpha$ R), estrogen receptor alpha (ER $\alpha$ ), and oxytocin receptor (OTR),

186 ii) angiogenesis factors such as VEGFA, VEGFR2, Ang1, Tie 2 and hypoxia inducible factor 1 alpha (HIF1 $\alpha$ ), iii)  
187 apoptosis factors such as TNF receptor 1 (TNFR1), Fas, Bax, Bcl-2, caspase 3 (casp3) and p53, and iv) Ras proteins  
188 such as transforming protein p21 (H-Ras) and Ras-related protein (R-Ras). A Protein-protein interaction analysis of the  
189 identified proteins was performed using Search Tool for the Retrieval of Interacting Genes (STRING) database v.10.0  
190 (<http://string.embl.de>) with the following analysis parameters Bos taurus species and all interaction sources. Biological  
191 processes, molecular function, and cellular components of CL proteins were classified as Gene Ontology (GO) of  
192 STRING functional enrichment network. The PPCL, SPCL and RPCL were preferentially analyzed using network and  
193 molecular action tools, then classified as Ras regulators according to biological process and molecular function in the  
194 STRING enrichment network system. Protein-protein interaction were shown using confidence value that is complex  
195 of the textmining, experiments, databases, co-expression, neighborhood, gene fusion and co-occurrence based on  
196 STRING database.

### 198 **Quantitative RT-PCR**

199 The mRNA was extracted using TRIzol (Takara, Shiga, Japan), and concentration was measured using NanoDrop  
200 2000 spectrophotometer (Thermo Scientific). Total 5.0  $\mu$ g mRNA was used to synthesis cDNA using PrimScript 1<sup>st</sup>  
201 strand cDNA synthesis kit (Takara), and reverse transcription was performed at 45°C for 60 min after 95°C for 5 min.  
202 The 1.0  $\mu$ L synthesized cDNA were used to conduct PCR and was performed according to the primer conditions  
203 (Supplementary Table S2) using PCR premix kit (Bioneer). Then, the products were separated with 2.0% agarose gel  
204 electrophoresis at 100 V for 20 min, stained with ethidium bromide, visualized with UV light, and mRNA expression  
205 was analyzed with ImageJ software (NCBI).

### 207 **Western blot**

208 The proteins (25  $\mu$ g/20  $\mu$ L) were separated by sodium dodecyl sulfate–polyacrylamide gel electrophoresis (SDS-  
209 PAGE) at 30 V for 20 min after 100V for 90 min, transferred to a polyvinylidene difluoride (PVDF) membrane at 30 V  
210 for 180 min at 4 °C, and incubated in blocking solution (5% skim milk in Tris-buffered saline/0.5% Tween-20; TBS-T)  
211 at RT for 60 min. The membranes were incubated with TBS-T with 1 % bovine serum albumin (BSA; Sigma) containing  
212 primary antibodies at 4 °C for overnight. The membranes were then washed three times with TBS-T each 5 min and  
213 incubated with secondary antibodies conjugated horseradish peroxidase and visualized using the West Save Enhanced  
214 Chemiluminescence kit (AbFrontier, Austin, TX). Protein expression was measured using the EZ-Capture II system  
215 (ATTO, Tokyo, Japan), and protein band intensity was calculated using ImageJ software (NCBI). Used antibodies were  
216 listed in Supplementary Table S3.

### 218 **Statistical analyses**

219 Data were analyzed using SAS ver. 9.4 software (SAS Institute, Cary, NC). Data are presented as mean  $\pm$  standard  
220 error. Data were evaluated using analysis of variance (ANOVA) and Duncan's multiple-range test using general linear  
221 models. A P value < 0.05 was considered to indicate statistical significance.

## Results

### 2-DE, mass spectrometry, and protein association analysis

Total 56 protein spots were detected in CL (Supplementary Table S4), of these 27 protein spots were repetitively detected at PPCL (Fig 1B), SPCL (Fig 1C) and RPCL (Fig 1D) were analyzed by MALDI-TOF/MS (Supplementary Fig S2; spot no. 1-12 and S3 Fig; spot no. 13-27) and determined to correspond to 18 different proteins (Table 1) which processing is summarized in Fig 1A. The confidence value of RABL5, RASAL3, RASA3, RasGEF1B, GSTA1, SWAP70, and GDI2 were less with other 11 proteins (Fig 1E). The RABL5 is play a role intracellular protein transport and GTP binding, RASAL3 and RASA3 (Table 1). The RASAL3, RASA3, RasGEF1B, and GDI2 play a role positive regulation of GTPase activity (Fig 1F, red), RABL5, RasGEF1B, and GDI2 mediate signal transduction via small GTPase (Fig 1F, blue), and RASAL3, RASA3 and GDI2 active GTPase activators (Fig 1F, green). Especially, RASAL3, RASA3, and RasGEF1B were directly involved in Ras proteins activation compared to RABL5 and GDI2 (Table 1). Based on 2-DE protein spot analysis, RABL5, RASAL3, RASA3, RasGEF1B and GDI2 protein spots were decreased in RPCL compare to PPCL and SPCL (Fig 1G). Especially, RASAL3 and RASA3 were increased but RasGEF1B were decreased in SPCL compared to PPCL (Fig 1G).

The Gene Ontology (GO) analysis of identified total CL proteins reveals over the half of all proteins at PPCL and SPCL involved in cellular process, single organism cellular process, biological process, cellular response to stimulus, and cell communication, whereas apoptotic process, negative cellular process, negative biological process, endocytosis, negative developmental process, and muscle contraction were mostly related with RPCL (Fig 2A). Based on classification of the identified differentially expressed protein in molecular function, over the 50 % of PPCL and SPCL proteins were involved in molecular function, heterocyclic compound binding, organic cyclic compound binding and ion binding (Fig 2B). Moreover, cellular components ratio of determined proteins was different during estrous cycle, kinds of cellular component were increased in PPCL (Fig 2C) to SPCL (Fig 2D), whereas, decreased at SPCL to RPCL (Fig 2E).

### Protein connection in hormone receptors, angiogenesis, apoptosis factors and Ras regulators

The  $3\beta$ -HSD, P4R, PGF2 $\alpha$ R and ER $\alpha$  mRNA (Fig 3A) and protein (Fig 3B) were decreased in RPCL compared to PPCL and SPCL, ER $\alpha$  and OTR proteins expression were higher at PPCL than SPCL and RPCL. Additionally, P4R was positive correlated with ER $\alpha$  but there were little molecular interaction between hormone receptors and Ras regulators according to in STRING protein-protein interaction data (Fig 3C).

The VEGFA and VEGFR2 mRNA (Fig 3D) and protein (Fig 3E) were increased at PPCL and SPCL compared to RPCL. The Ang1 mRNA and protein expression were higher at SPCL than PPCL and RPCL, and Tie2 mRNA was no significantly difference between PPCL and SPCL, but protein was increased at SPCL compared to PPCL and RPCL. (Fig 3E). According to STRING data, there were highly correlative between angiogenetic factors and Ras regulators, moreover both VEGFA and Tie2 had various molecular action to VEGFR2 and Tie2 (Fig 3F). Furthermore, STRING data showed that the VEGFR2 and Tie2 were not only bound (blue line) and reacted (black line) with RasGEF1B but also was activated (green arrow) by the VEGFR2 and Tie2 (Fig 3F).

260 The TNFR1, Bax and Casp3 mRNA (Fig 3G) and protein (Fig 3H) were increased at RPCL than PPCL and SPCL.  
261 Fas protein were increased at RPCL, but mRNA were not different among the CL phases. There were few molecular  
262 action between apoptotic factors and Ras regulators in STRING database (Fig 3I).

### 263 264 **Association of hormone receptors, angiogenesis, apoptosis and Ras family member proteins in corpus luteum** 265 **during estrous cycle**

266 Protein association among hormone receptors, angiogenetic factors, apoptotic factors, Ras regulators (RASAL3,  
267 RASA3 and RasGEF1B), and Ras proteins (H-Ras and R-Ras) were shown Fig 4A. According to STRING database,  
268 P4R and ER $\alpha$  were activated (green arrows) with p53 each other, and ER $\alpha$  had transcriptional regulation (yellow line)  
269 to VEGFA, and the RasGEF1B were activated, bound (blue line) and reacted (black line) by VEGFR2 and Tie2 (Fig  
270 4A). Additionally, H-Ras and R-Ras were catalyzed (purple line), bound and activated by VEGF2, Tie2 and RasGEF1B,  
271 H-Ras had many molecular action with VEGFA distinct from R-Ras (Fig 4A) according to STRING database.  
272 Interestingly, only H-Ras of the Ras family member was bound and activated by p53 and inhibited (red line) Casp3 in  
273 apoptotic factors (Fig 4A). RasGAP, RasGEF and Ras mRNA (Fig 4B) and proteins (Fig 4C) were decreased in RPCL  
274 compared to PPCL and SPCL. The RASA3, RASAL3, and RasGEF1B mRNA were no significantly between PPCL  
275 and SPCL, H-Ras and R-Ras mRNA expression were reduced in SPCL and RPCL compared to PPCL (Fig 4B). The  
276 RasGAP protein expression were higher in SPCL than PPCL, otherwise RasGEF, H-Ras, and R-Ras were reduced in  
277 SPCL and RPCL compared PPCL (Fig 4C).

### 278 279 280 **CL morphology, weight, and serum progesterone level during estrous cycle**

281 The PPCL (Fig 5A), SPCL (Fig 5B) and RPCL (Fig 5C) tissues (black arrows) morphology were changed during estrous  
282 cycle, and ovulation site of CL diameter (Fig 1D) was higher at SP than PP and RP. The blood vessel (white circle),  
283 LEC (white arrows), large LSC (yellow arrows), small LSC (orange arrows) were observed in CL tissue section (Fig  
284 1G, H, I). The number blood vessels were more observed in PPCL (see the supplementary Fig S4A and B) than SPCL  
285 (see supplementary Fig S4C, D, E and F) and RPCL (see supplementary Fig S4G and H). The number of large LSC per  
286  $10^5 \mu\text{m}^2$  (Fig 5E) was not be observed in PPCL, whereas could be detected in SPCL and RPCL. Mostly LSCs and LECs  
287 were shrunk and damaged in RPCL (Fig 5I) and cell to cell spaces (Fig 5F) were not detected in PPCL and SPCL but  
288 could be observed in RPCL. The PPCL was tinged with red (Fig 5J), then size and weight were gradually increased at  
289 PP to SP (Fig 5J). Additionally, PPCL inside was redder than SPCL inside, size and weight of RPCL were decreased  
290 compared to PPCL and SPCL (Fig 5J and supplementary Fig S5). The RPCL had a yellow color (Fig 5J and  
291 supplementary Fig S5C), was harder than PPCL and SPCL (data not shown). The Ras and its regulator factors (Fig 1G,  
292 4B and 4C; Ras activation), tissues size and weight (Fig 5D and 5J; tissue growth), VEGFA, VEGFR2, Ang1 and Tie2  
293 (Fig 3D and 3E; angiogenesis) proteins expression were highest when blood P4 level was consistently increased (Day  
294 2 to 10, PP; see the Fig 5L). On the other hand, Ras activation, tissue growth, and angiogenesis (Fig 5K) were reduced  
295 when serum P4 level was highest (Day 14 to 18, SP; see the Fig 5L). However, CL size and weight (Fig 5D and 5J)  
296 were rapidly decreased with P4 reduction (Fig 5L), at this point (Day 18 to 20; RP) apoptotic factor proteins (TNFR1,



p53, Bax and Casp3; see the Fig 3G and H) were increased compared to PP and SP, most angiogenetic factors and Ras family members were dramatically reduced in RP (Fig 5K).

## Discussion

Generally, P4 increases the endometrium, is involved in pregnancy maintenance and inhibits follicle growth in the female reproductive system (4, 5). In practice, continuous P4 synthesis from LSCs is needed to ensure the interaction between intercellular P4 activity and its nuclear receptor and to active steroidogenic enzymes (11, 21). The main function of the endocrine gland (P4 synthesis and secretion) is to ensure a source of LSCs, but LECs are also important for the development and maintenance of tissues structure in the CL. The CL is composed of LECs (52.7%), large LSCs (3.4%), small LSCs (26.7%), fibrocytes (10.0%), and other cell types (7.5%). Although the numbers of LECs and pericytes are greater than those of the large and small LSCs, the volume density of large LSCs (40.2%) and small LSCs (27.7%) is greater than that of the LECs (13.3%) (22). Generally, LSCs and LECs in the CL develop rapidly after ovulation, during which time activation of angiogenesis is initiated (23). Commonly, VEGF and Ang1 are considered representative angiogenetic growth factors, and a balance of growth factors and their receptors has been reported to contribute to the proliferation of LSCs and LECs during the proliferation phase (8). Therefore, angiogenetic factors and their receptors have special meaning for CL development as a direct result of LSC proliferation, leading to P4 production. Synthesized P4 in LSCs is secreted from the cellular membrane, and the blood P4 level and CL weight consistently increase during the proliferation phase to immediately before the secretion phase. LSC differentiation and proliferation stop at days 12 to 18 after ovulation. Our results showed that the P4 concentration of Korean native cattle at days 12 to 18 after ovulation was 3.0 - 4.0 ng/mL and that the P4 at the secretion phase was higher than that at the proliferation and regression phases. Although the blood P4 level of Korean native cattle heifers was lower than that of previous reports, we confirmed that the pattern of the serum P4 concentration during the estrous cycle was similar to that of previous reports (24, 25). The high PGF2 $\alpha$  level and dramatic reduction induce death signal activation in luteal cells, leading to functional and structural luteolysis, such as reduction of P4 production and secretion and luteal tissue and cell degradation (11). Our results detected a large cellular distance, condensation of cellular morphology, and blood vessel degradation in the RPCL. Overall, differentiation of ovarian cells (granulosa and theca cells) to LSCs (large and small LSCs), LSC and LEC proliferation and the resulting angiogenesis, P4 synthesis and secretion of LSCs, and tissue regression related to luteolysis and apoptosis were sequentially matched to the increase, maintenance and reduction of the blood P4 concentration. Therefore, we speculated that the effects of the change in the blood P4 concentration on proliferation, angiogenesis, and apoptosis of luteal cells and tissues might be closely related to Ras family members, because Ras deeply controls cell proliferation, differentiation, morphology, and survival (14).

The story of small G proteins started more than three decades ago and was followed by the discovery of the Ras superfamily (26). The major isoforms H-Ras, K-Ras, and N-Ras are highly conserved but show different biological outputs. Additionally, the Ras family includes the Rap, R-Ras, Ral, and Rheb proteins, which play roles mainly as transduction nodes in various signaling pathways (27). Ras family members in the female reproductive tracts have been studied in the endometrium and ovary and typically include activated epidermal growth factor receptor (EGFR) tyrosine kinase, which stimulates mitogen-activated protein kinase/extracellular-signal-regulated kinase (MAPK/ERK) and

334 induces the cell cycle, an increase in the tumor size, and proliferation in various ovarian cancer cells (28, 29).  
335 Additionally, Ras is controlled by a molecular switch by cycling between the inactive Ras-GDP and active Ras-GTP  
336 conformations, and GDP/GTP binding is regulated by RasGEF and RasGAP(30). As such, Ras has been widely studied  
337 in ovarian cancer, but studies of Ras family members during formation and regression of the CL induced by P4 produced  
338 from the ovary have not been reported to date.

339 RASAL3 and RASA3 belong to the RasGAP family, and RasGEF1B belongs to the RasGEF family (30). The  
340 RasGAP members are largely divided into four classes [RASA1/p120GAP, neurofibromatosis type 1 (NF1), GAP1<sup>m</sup>  
341 family, and Synaptic GAP (SynGAP)] according to the Src homology (SH), pleckstrin homology (PH) and protein  
342 kinase C2 homology domains (31). The first RasGAP to be characterized was p120 RasGAP or Ras p21 protein activator  
343 1 (RASA1) (31, 32). RASA3 is one member of the GAP1<sup>m</sup> family, and its PH domains bind to phosphatidylinositol  
344 (3,4,5)-trisphosphate (PIP<sub>3</sub>) in the cell membrane, which conducts the role of RasGAP. Conversely, RASAL3 is a  
345 member of the SynGAP family, but knockdown and knockout studies of this Ras have not been reported (31). RasGAP  
346 protein expression was increased in the SPCL when CL formation was completed this result suggested that the RasGAP  
347 protein might regulate inhibition of CL formation, because RasGAP induced Ras inactivation as a switch off (30).  
348 RasGEF increases the GTP-bound conformation with Ras and contains Sos, RasGRF, and RasGRP. RasGEF1B is a  
349 subfamily of RasGEF(33). Our study, during the PP activation of RasGEF was increased when the luteal cells and CL  
350 were proliferating and developing and the blood P4 concentration increased until 3.0 ng/mL. However, RasGAP was  
351 increased in the PPCL compared to that in the SPCL when luteal cell and CL development stopped and blood P4 was  
352 maintained at a high concentration (up to 3.0 ng/mL). All RasGAP and RasGEF protein spots and mRNA and protein  
353 expression levels were decreased in the RPCL; during this phase, loss of tissue weight and size, a reduction of the blood  
354 P4 concentration, cell disruption, and an increase in the cell to cell distance and apoptotic factors were observed.  
355 Therefore, we suggest that the roles of RasGEF and RasGAP are closely related to the formation and finishing of CL  
356 development during the estrous cycle. Moreover, the blood P4 level seems to be associated with RasGAP and RasGEF  
357 activation. Although an influence of P4 on the effects of Ras, RasGAP, and RasGEF on CL formation and regression  
358 has not been reported, this study may contribute to understanding of the roles of the Ras pathway following hormone  
359 changes during tissue formation and regression.

360 Studies of hormones and their receptors have been widely conducted because formation and regression of the CL  
361 into the ovary are repeated in response to various hormone reactions, which control the reproductive cycle (4). Based  
362 on the bioinformatics analysis, P4R not only reacted to but its transcription was also regulated by ER $\alpha$ , and the  
363 interaction between P4R and ER $\alpha$  was closer than those of PGF2 $\alpha$ R, ER $\alpha$ , and OTR with P4 in the PPCL. Similar to P4  
364 and E2, the physiological interaction may be more activated in the PP and SP during cellular proliferation and  
365 maintenance. However, no association was found between the hormone receptors and the Ras regulators (RASAL3,  
366 RASA3, and RasGEF1B). The hormone receptor and Ras regulator aspect of the in silico assay showed that the hormone  
367 receptors were not directly regulated by the Ras regulators, we know that there were few study on its receptors and Ras  
368 regulators as evidence assay.

369 We focused on the VEGFA-VEGFR2 and Ang1-Ti2 systems of angiogenetic factors because these systems were  
370 well known key factors for CL formation (23). Generally, relationship between sex hormones and angiogenetic systems

371 plays an important role for proliferation and maintenance in the CL lifespan (34). Furthermore, our study showed that  
372 angiogenic receptors (VEGFR2 and Tie2) and RasGEF1B were highly interrelated. Generally, Ras activation starts  
373 from receptor tyrosine kinases (RTKs) and G protein-coupled receptors (GPCRs) in the plasma membrane (30, 35). The  
374 RTKs are high-affinity cell surface receptors for many polypeptide growth factors, cytokines, and hormones; VEGFR2  
375 and Tie2 (angiopoietin receptor) are included in the RTKs (36). The RTKs and GPCRs combined with growth factors  
376 and hormones lead to RasGEF activation and increase the Ras-GTP conformation, which causes cell proliferation,  
377 differentiation, and transcription through ERK, MAPK and various cellular pathways (35). We found that RasGEF1B  
378 and the angiogenic receptors bound and reacted to each other and that RasGEF1B was activated by VEGFR2 and Tie2  
379 of the RTK family. However, no interaction was found between RASA3 and RASA3 of the RasGAP and angiogenic  
380 factors. We suggest that RasGEF is closely related to angiogenesis of the CL during the PP and SP. Thus, increasing the  
381 high P4 concentration in the blood may activate RasGEF1B. A study of the relationship between RasGEF1B and P4 is  
382 expected in LECs and LSCs.

383 The prototypic mammalian Ras proteins (H-, K- and N-Ras) share over 90% sequence homology and have similar  
384 activity, although H-Ras is a more potent activator of phosphoinositide 3-kinase (PI3K) than K-Ras (37, 38). Deletion  
385 of H-Ras results in apoptosis, cell cycle arrest and loss of tumor size in ovarian epithelial cancer cells, whereas H-Ras  
386 upregulation increases the reduction of apoptosis but also leads to proliferation through MAPK and ERK signaling in  
387 ovarian cancer cells (28, 39, 40). R-Ras is also a small GTPase of the Ras family that regulates cell survival and integrin  
388 activity mainly through regulating vascular regeneration in mammalian muscle, intestine, lung, spleen, spinal cord, bone  
389 marrow and skeletal muscle (41). We tested the molecular association of H-Ras and R-Ras on interactions with hormone  
390 receptors, angiogenic and apoptotic factors and Ras regulators because we first determined that RASA3 (Ras p21  
391 protein activation) and RASA3 (Ras protein activator-like 3) directly regulated H-Ras (also called transforming protein  
392 p21) in the bovine CL based on our proteomics techniques. Although K-Ras and N-Ras are also transforming protein  
393 p21 similar to H-Ras, K-Ras mRNA expression did not differ between the PPCL and SPCL (Supplementary Fig S7),  
394 and the protein association between N-Ras and angiogenic factors were lower than those of H-Ras (Supplementary  
395 Fig S8). Second, because R-Ras was deeply related to vascular regeneration, proliferation, and stabilization, we also  
396 studied CL formation focus on angiogenic influences (41). R-Ras only interacted with angiogenic receptors  
397 (VEGFR2 and Tie2), whereas H-Ras had no molecular action with angiogenic receptors but did interact with VEGFA  
398 and p53. These results suggest that H-Ras may have more molecular actions than R-Ras in cellular processes.  
399 Additionally, RASA3 and RASA3 had low correlations with angiogenic and apoptotic factors, which indicated that  
400 downregulation of Ras was not directly associated with angiogenic and apoptotic factors. Interestingly, no interaction  
401 was found between only hormone receptors and Ras regulators, whereas P4R was linked to Ras activation through the  
402 ER $\alpha$ -VEGFA-VEGFR2 or Tie2-GasGEF1B and ER $\alpha$ -p53-H-Ras signal pathways. The results signified that P4 could  
403 activate Ras via angiogenic proteins and p53, although few studies have investigated the effects of hormone receptors  
404 on Ras in mammals. The observed association pattern of an increase in Ras family member proteins by angiogenic  
405 factors compared to apoptotic factors indicated that Ras might play a regulatory role via angiogenesis and that the  
406 hormone receptors that influenced Ras activation might be more involved in the angiogenesis pathway than the apoptosis  
407 pathway. Interestingly, molecular signaling from P4R led to the Ras activation signal through angiogenic factors

(transcription of VEGFA), but p53 activation via P4R stimulation could not activate overall Ras family members; instead, p53 had molecular actions, such as binding and a transcriptional reaction with H-Ras.

The changes in the RasGAP (RASAL3 and RASA) and RasGEF (RasGEF1B) 2-DE protein spots were similar to the RasGAP and RasGEF immunoblotting results, and H-Ras and R-Ras were strongly expressed in the SPCL. These results show an effect of the abundant RasGEF expression switch on Ras activations in luteal cells of the PPCL, which increases cellular proliferation and differentiation of ovarian cells to steroidogenic cells when CL formation is complete. Conversely, abundant RasGAP restricts the proliferation and differentiation of mature LECs and LSCs in the SPCL. These results indicated that the balance of RasGAP and RasGEF in terms of Ras activation controls the start and finish of CL formation. The blood P4 concentration gradually increased when abundant RasGEF was present and was maintained at high levels when RasGAP was abundant and RasGEF was deficient. Interestingly, the total H-Ras and R-Ras amounts during the PPCL were higher than those during the SPCL which show that numerous Ras proteins may be necessary for successful proliferation and differentiation of luteal cells during the PP. When determining whether Ras family members impact luteal cells, we should note that changes in Ras family members in LECs and LSCs derived from the CL may occur during the estrous cycle because the CL is composed of various cell types. Our results showed strong RasGEF, H-Ras and R-Ras expression in the CL was accompanied by an increase in P4 expression in the blood during the PP. We suggest that the P4 concentration may affect Ras family members and thus proliferation and differentiation of LECs and LSCs. In addition to P4, follicular stimulation hormone (FSH), LH, E2 and PGF2 $\alpha$  control the formation and regression of the CL in mammals. Additionally, tissue growth, angiogenesis, and Ras activation coincided with a gradual increase in the blood P4 level in the CL during the PP, and subsequently Ras activation, CL formation, and angiogenesis were matched to a high blood P4 concentration. Although no influence of P4 on Ras, RasGAP and RasGEF was detected in the LECs and LSCs, these results demonstrate that changes in Ras family members follow the serum P4 concentration during tissue formation and regression and protein interactions with hormone receptors, angiogenesis, apoptosis, Ras regulators, and Ras proteins based on the bioinformatics analysis, which is beneficial to fundamental studies of the relationship of sex hormones with Ras during tissue development.

For more than three decades, studies of Ras family members in various mammalian tissues have increased understanding of the biological functions of Ras, especially the effects of mutated Ras on excessive RTK family activation, integrin factor destabilization, and abnormal angiogenesis; ultimately, these events cause abnormal proliferation and survival in tumors and cancers (28, 31, 39, 41). However, few studies have investigated the influence of sex hormones on Ras biological functions, because sex hormones influence particular tissues, such as reproductive tracts, which have sex hormone receptors (42). Unfortunately, studies of the influence of P4 on the CL have mostly focused on domestic animal productivity in livestock for decades. As a result, reproductive science can completely control survival and death of the CL using hormone treatment. On the other hand, living things control the lifespan of special tissues, such as the “corpus luteum”, using the pituitary gland via the reproductive tissue feedback system and steroidogenic hormone regulation, and similarly massive amounts of information are available for tissue formation and regression in living things. Ras family members are one example of this type of information.

## Conclusions

We suggest that the detailed molecular function of Ras is available for discovery during formation and regression of the CL. Therefore, understanding the roles of the RasGAP, RasGEF, and Ras proteins following shifts in the P4 concentration may provide new perspectives for the relationship between Ras and hormones during tissue formation and regression. We suggest that this knowledge may contribute to therapy for hormonal diseases.

#### Acknowledgements

The authors thank the Institute of Animal Resources at the Kangwon National University for their services. This work was supported by National Research Foundation of Korea (NRF 2018R1D1A3B07048167), Republic of Korea. This study supported by 2017 Research Grant from Kangwon National University (No. 520170021).

#### Author contribution

S.H. Lee and S. Lee designed and oversaw the study. S.H. Lee collected samples, S.H. Lee and S. Lee performed experiment. S. Lee analyzed genes and proteins, and S.H. Lee performed proteomics and bioinformatics. S.H. Lee wrote the paper and S. Lee made figures and tables. S.H. Lee and S. Lee wrote figure legends and supplementary information. All authors contributed to the critical review of the manuscript.

#### Abbreviations

2-DE, two-dimensional electrophoresis; CL, corpus luteum; P4, progesterone; PP, proliferation phase; RP, regression phase; SP, secretion phase

#### References

1. Stocco C, Telleria C, Gibori G. The molecular control of corpus luteum formation, function, and regression. *Endocr Rev.* 2007;28: 117-149.
2. Mann G. Corpus luteum size and plasma progesterone concentration in cows. *Anim Reprod Sci.* 2009;115: 296-299.
3. Niswender GD, Juengel JL, Silva PJ, Rollyson MK, McIntush EW. Mechanisms controlling the function and life span of the corpus luteum. *Physiol Rev.* 2000;80:, 1-29.
4. Forde N, Beltman M, Lonergan P, Diskin M, Roche J, Crowe M. Oestrous cycles in *Bos taurus* cattle. *Anim Reprod Sci.* 2011;124: 163-169.
5. Sartori R, Barros C. Reproductive cycles in *Bos indicus* cattle. *Anim. Reprod. Sci.* 2011;124: 244-250.
6. Schams D, Berisha B. Regulation of corpus luteum function in cattle—an overview. *Reprod Domest Anim.* 2004;39: 241-251.
7. Nishimura R, Okuda K. Hypoxia is important for establishing vascularization during corpus luteum formation in cattle. *J Reprod Dev.* 2010;56: 110-116.

- 481 8. Yoshioka S, Abe H, Sakumoto R, Okuda K. Proliferation of luteal steroidogenic cells in cattle. *PLoS One* 2013;8:  
482 e84186.
- 483 9. Tanaka J, Acosta TJ, Berisha B, Tetsuka M, Matsui M, Kobayashi S, et al. Relative changes in mRNA  
484 expression of angiopoietins and receptors tie in bovine corpus luteum during estrous cycle and prostaglandin  
485 F2 $\alpha$ -induced luteolysis: a possible mechanism for the initiation of luteal regression. *J Reprod Dev.* 2004;50:  
486 619-626.
- 487 10. Ulbrich SE, Groebner AE, Bauersachs S. Transcriptional profiling to address molecular determinants of  
488 endometrial receptivity—lessons from studies in livestock species. *Methods* 2013;59: 108-115.
- 489 11. Rekawiecki R, Kowalik M, Slonina D, Kotwica J. Regulation of progesterone synthesis and action in bovine  
490 corpus luteum. *J Physiol Pharmacol.* 2008;59: 75-89.
- 491 12. Okuda K, Sakumoto R. Multiple roles of TNF super family members in corpus luteum function. *Reprod Biol*  
492 *Endocrinol.* 2003;1: 95.
- 493 13. Bos JL, Rehmann H, Wittinghofer A. GEFs and GAPs: critical elements in the control of small G proteins. *Cell*  
494 2007;129: 865-877.
- 495 14. Goitre L, Trapani E, Trabalzini L, Retta SF. The Ras superfamily of small GTPases: the unlocked secrets. *Ras*  
496 *Signaling* 2014;1-18.
- 497 15. Richards J, Fan HY, Liu Z, Tsoi M, Laguë MN, Boyer A, et al. Either Kras activation or Pten loss similarly  
498 enhance the dominant-stable CTNNB1-induced genetic program to promote granulosa cell tumor development  
499 in the ovary and testis. *Oncogene* 2012;31: 1504-1520.
- 500 16. Palejwala S, Goldsmith LT. Ovarian expression of cellular Ki-ras p21 varies with physiological status. *Proc*  
501 *Natl Acad Sci.* 1992;89: 4202-4206.
- 502 17. Park CK, Lee JE, Lee YS, Yoo HJ, Lee KJ, Park JJ, et al. Influence of Interferon- $\tau$  on the Production of  
503 Prostaglandins, Cyclooxygenase-2 Expression In Vitro and Release of Progesterone in Bovine Endometrial  
504 Cells. *J Emb Trans.* 2012;27: 245-252.
- 505 18. Lee S, Lee SH, Yang BK, Park CK. The expression of VEGF, myoglobin and CRP2 proteins regulating  
506 endometrial remodeling in the porcine endometrial tissues during follicular and luteal phase. *Anim Sci J.*  
507 2017;88: 1291-1297.
- 508 19. Lee SH, Song EJ, Hwangbo Y, Lee S, Park CK. Change of uterine histroph proteins during follicular and luteal  
509 phase in pigs. *Anim Reprod Sci.* 2016;168: 26-33.
- 510 20. Szklarczyk D, Franceschini A, Kuhn M, Simonovic M, Roth A, Minguéz P, et al. The STRING database in  
511 2011: functional interaction networks of proteins, globally integrated and scored. *Nucleic acids research*  
512 2010;39: D561-D568.
- 513 21. Niswender GD. Molecular control of luteal secretion of progesterone. *Reproduction* 2002;123: 333-339.
- 514 22. O'shea J, Rodgers R, D'occhio M. Cellular composition of the cyclic corpus luteum of the cow. *J Reprod Fertil.*  
515 1989;85: 483-487.
- 516 23. Reynolds LP, Grazul-Bilska AT, Redmer DA. Angiogenesis in the corpus luteum. *Endocrine* 2000;12: 1-9.
- 517 24. Shirasuna K, Watanabe S, Asahi T, Wijayagunawardane MP, Sasahara K, Jiang C, et al. Prostaglandin F2 $\alpha$

- 518 increases endothelial nitric oxide synthase in the periphery of the bovine corpus luteum: the possible regulation  
519 of blood flow at an early stage of luteolysis. *Reproduction* 2008;135: 527-539.
- 520 25. Gifford C, Racicot K, Clark D, Austin K, Hansen T, Lucy M, et al. Regulation of interferon-stimulated genes  
521 in peripheral blood leukocytes in pregnant and bred, nonpregnant dairy cows. *J Dairy Sci.* 2007;90: 274-280.
- 522 26. Cox AD, Der CJ. Ras history: The saga continues. *Small GTPases* 2010;1: 2-27.
- 523 27. Karnoub AE, Weinberg RA. Ras oncogenes: split personalities. *Nat Rev Mol Cell Biol.* 2008;9: 517-531.
- 524 28. Santarpia L, Lippman SM, El-Naggar AK. Targeting the MAPK–RAS–RAF signaling pathway in cancer  
525 therapy. *Expert Opin Ther Targets* 2012;16: 103-119.
- 526 29. Xing D, Orsulic SA genetically defined mouse ovarian carcinoma model for the molecular characterization of  
527 pathway-targeted therapy and tumor resistance. *Proc. Natl. Acad. Sci.* 2005;102: 6936-6941.
- 528 30. Hennig A, Markwart R, Esparza-Franco MA, Ladds G, Rubio I. Ras activation revisited: role of GEF and GAP  
529 systems. *Biol Chem.* 2015;396: 831-848.
- 530 31. King PD, Lubeck BA, Lapinski PE. Nonredundant functions for Ras GTPase-activating proteins in tissue  
531 homeostasis. *Sci Signal.* 2013;6: 1-24.
- 532 32. Vogel US, Dixon RA, Schaber MD, Diehl RE, Marshall MS, Scolnick EM, et al. Cloning of bovine GAP and  
533 its interaction with oncogenic ras p21. *Nature* 1988;335: 90-93.
- 534 33. Díez D, Sanchez-Jimenez F, Ranea JA. Evolutionary expansion of the Ras switch regulatory module in  
535 eukaryotes. *Nucleic Acids Res.* 2011;39: 5526-5537.
- 536 34. Lee SH, Acosta TJ, Yoshioka S, Okuda K. Prostaglandin F<sub>2</sub> $\alpha$  regulates the nitric oxide generating system in  
537 bovine luteal endothelial cells. *J Reprod Dev.* 2009;55: 418-424.
- 538 35. Chavan TS, Muratcioglu S, Marszalek R, Jang H, Keskin O, Gursoy A, et al. Plasma membrane regulates Ras  
539 signaling networks. *Cellular logistics* 2015;5: e1136374.
- 540 36. Schlessinger J. Cell signaling by receptor tyrosine kinases. *Cell* 2000;103: 211-225.
- 541 37. Yan J, Roy S, Apolloni A, Lane A, Hancock JF. Ras isoforms vary in their ability to activate Raf-1 and  
542 phosphoinositide 3-kinase. *J Biol Chem.* 1998;273: 24052-24056.
- 543 38. Niv H, Gutman O, Kloog Y, Henis YI. Activated K-Ras and H-Ras display different interactions with saturable  
544 nonraft sites at the surface of live cells. *J Cell Biol.* 2002;157: 865-872.
- 545 39. Yang G, Thompson JA, Fang B, Liu J. Silencing of H-ras gene expression by retrovirus-mediated siRNA  
546 decreases transformation efficiency and tumorgrowth in a model of human ovarian cancer. *Oncogene* 2003;22:  
547 5694-5701.
- 548 40. Yang G, Rosen DG, Zhang Z, Bast RC, Mills GB, Colacino JA, et al. The chemokine growth-regulated  
549 oncogene 1 (Gro-1) links RAS signaling to the senescence of stromal fibroblasts and ovarian tumorigenesis.  
550 *Proc Natl Acad Sci.* 2006;103: 16472-16477.
- 551 41. Komatsu M, Ruoslahti E. R-Ras is a global regulator of vascular regeneration that suppresses intimal  
552 hyperplasia and tumor angiogenesis. *Nat. Med.* 2005;11: 1346-1350.
- 553 42. von Lintig FC, Dreilinger AD, Varki NM, Wallace AM, Casteel DE, Boss GR. Ras activation in human breast  
554 cancer. *Breast Cancer Res Treat.* 2000;62: 51-62.

555 **Figure legends**

556 **Fig 1** Strategy of discover on Ras family members signaling focused on proliferation and regression of corpus luteum  
557 (CL) and progesterone level during estrous cycle based on two dimensional electrophoresis (2-DE), mass spectrometry  
558 (MS), and bioinformatics (A), Distribution of protein spots in acrylamide gels using 2-DE of the CL at day 2 (B,  
559 proliferation phase CL; PPCL), day 16 (C, secretion phase SPCL; SP), and day 20 (D, regression phase CL; RPCL)  
560 after ovulation (each phase CL,  $n = 4$ ). The spot numbers correspond to the labels in Table 1. The original 2-DE gel  
561 image with size marker were shown as Supplementary Fig S9. The protein network of the discovered protein spots was  
562 analyzed using evidence tools in the STRING database (E, F). The line color indicates the type of interaction evidence.  
563 (F) Molecular interaction of protein spots in the CL during the estrous cycle. The blue line indicates the binding ability,  
564 and the line shape indicates the predicted mode of action. Proteins related to GTPase activity were classified with the  
565 gene ontology (GO) tool in the STRING database. (G) Changes in RABL5 (Spot no. 2), RASAL3 (Spot no. 7), RASA3  
566 (Spots no. 10 and 11), RasGEF1B (Spot no. 16), and GDI2 (Spot no. 23) protein spot expression at the PPCL, SPCL,  
567 and RPCL. Expression of protein spots at the SP and RP was normalized to that of the PP.  $**p<0.01$  and  $*p<0.05$ ,  $n=4$ .

568  
569 **Fig 2** Biological processes (A), molecular functions (B) and cellular component ratios (C) of corpus luteum (CL) protein  
570 spots at proliferation phase (PP) CL, secretion phase (SP) CL, and regression phase (RP) CL were analyzed using Gene  
571 Ontology, and (C-E) the cellular component ratios of the protein spots from the PPCL (C), SPCL (D), and RPCL (E)  
572 were analyzed using the STRING database.

573  
574 **Fig 3** Association of hormone receptors, angiogenesis, apoptosis and Ras family member proteins in corpus luteum  
575 during estrous cycle. Changes in  $3\beta$ -Hydroxysteroid dehydrogenase ( $3\beta$ -HSD), progesterone receptor (P4R),  
576 prostaglandin F2 alpha receptor (PGF2 $\alpha$ R), estrogen receptor alpha (ER $\alpha$ ) and oxytocin receptor (OTR) mRNA (A) and  
577 protein (B); vascular endothelial growth factor A (VEGFA), VEGF receptor 2 (VEGFR2), angiopoietin 1 (Ang1), Tie2,  
578 and hypoxia inducible factor 1 alpha (HIF1 $\alpha$ ) mRNA (D) and protein (E); tumor necrosis factor receptor 1 (TNFR1),  
579 Fas, p53, Bax, Bcl-2 and caspase 3 (Casp3) mRNA (G) and protein (H) expression at the proliferation phase (PP,  $n =$   
580 4), secretion phase (SP,  $n = 4$ ), and regression phase (RP,  $n = 4$ ) during the estrous cycle in the corpus luteum (CL).  
581 mRNA and protein expression at the SPCL and RPCL, was normalized to that of the PPCL. Molecular action between  
582 GTPase regulators (RABL5, RASAL3, RASA3, RasGEF1B, and GDI2) and hormone receptors (C; P4R, PGF2 $\alpha$ R, ER $\alpha$ ,  
583 and OTR), angiogenetic factors (F; VEGFA, VEGFR2, Ang1, Tie2, and HIF1 $\alpha$ ) and apoptotic factors (I; TNFR1, Fas,  
584 p53, Bax, Bcl-2 and Casp3). The line shape indicates the predicted mode of action.  $**p<0.01$  and  $*p<0.05$ . The size and  
585 molecular weight image of PCR products and proteins were shown as Supplementary Fig S10-S13.

586  
587 **Fig 4** Association of hormone receptors, angiogenesis, apoptosis and Ras family member proteins in corpus luteum  
588 during estrous cycle (A). Molecular action among hormone receptors (P4R, PGF2 $\alpha$ R, ER $\alpha$ , and OTR), angiogenetic  
589 factors (VEGFA, VEGFR2, Ang1 and Tie2), apoptotic factors (TNFR1, Fas, p53, Bax, and Casp3), Ras regulators  
590 (RASAL3, RASA3, and RasGEF1B), and Ras proteins (H-Ras and R-Ras). Changes in RASAL3, RASA3, RasGEF1B,



H-Ras, and R-Ras mRNA (B) expression and Ras GTPase-activating protein (RasGAP), guanine nucleotide exchange factor (RasGEF), H-Ras, and R-Ras protein (C) expression at the proliferation phase corpus luteum (PPCL,  $n = 4$ ), secretion phase CL (SPCL,  $n = 4$ ), and regression phase CL (RPCL,  $n = 4$ ). mRNA and protein expression in the SPCL and RPCL were normalized to that in the PPCL. \*\* $p < 0.01$  and \* $p < 0.05$ . The size and molecular weight image of PCR products and proteins were shown as Supplementary Fig S11B and S16B.

**Fig 5** Change of morphology, growth, Ras activation, angiogenesis, apoptosis factors and serum progesterone (P4) level during estrous cycle in corpus luteum (CL). Bovine corpus luteum morphology at the proliferation phase (PP; A), secretion phase (SP; B), and regression phase (RP; C) during the estrous cycle. Black arrows indicate the ovulation site and outside of the corpus luteum (CL; PPCL,  $n = 15$ ; SPCL,  $n = 20$ ; RPCL,  $n = 23$ ) in the ovary; black scale bar = 1.0 cm. Ovulation site of the CL diameter (D), and The PPCL (G), SPCL (H) and RPCL (I) section was evaluated using hematoxylin and eosin staining; blood vessel (white circles), white arrows (luteal endothelial cells; LECs), yellow arrows (large luteal steroidogenic cell; large LSC), orange arrows (small LSC), red arrows (cell-cell space), white scale bar = 50  $\mu\text{m}$ . the number of large LSCs (E) was greater than 20  $\mu\text{m}$  per  $1.0 \times 10^6 \mu\text{m}^2$  (PPCL, not detected; SPCL,  $58.4 \pm 3.0$  and RPCL,  $52.3 \pm 2.5$ ), and the distance of cell to cell (F) (PPCL and SPCL, not detected and RPCL,  $5.68 \pm 0.70 \mu\text{m}$ ) was calculated under the microscope. Morphology and weight of isolated CL derived from an ovary at PP, SP and RP (J), Ras activation, tissue growth, angiogenesis, and apoptosis activation during the estrous cycle in the CL (K), Changes in the serum P4 level during the estrous cycle in cows. Blood was collected every 2 days for 24 days ( $n = 10$  cows). \*\* $p < 0.01$

**Table 1.** Change of proteins among corpus luteum during estrous cycle

| No. spot <sup>a</sup> | Protein (abbreviation)                              | Accession No. | MW <sup>b</sup> /pI <sup>c</sup> | Cov. <sup>d</sup> (%) | Expression      |                 |                 | Biological process                   | Molecular function |
|-----------------------|-----------------------------------------------------|---------------|----------------------------------|-----------------------|-----------------|-----------------|-----------------|--------------------------------------|--------------------|
|                       |                                                     |               |                                  |                       | PP <sup>e</sup> | SP <sup>f</sup> | RP <sup>g</sup> |                                      |                    |
| 1                     | Protein disulfide-isomerase A3 (PDIA3)              | P38657        | 56,930/6.2                       | 41.2                  | O               | O               | O               | Protein disulfide isomerase activity | Protein folding    |
| 2                     | Intraflagellar transport protein 22 homolog (RABL5) | Q5E9J4        | 20,872/5.0                       | 25.4                  | O               | O               | X               | Intracellular protein transport      | GTP binding        |

|    |                                                       |        |             |      |      |   |   |                                                                  |                                                |
|----|-------------------------------------------------------|--------|-------------|------|------|---|---|------------------------------------------------------------------|------------------------------------------------|
| 3  | Vimentin (VIM)                                        | P48616 | 53,728/5.1  | 75.1 | O    | O | X | Muscle filament sliding                                          | Structural constituent of cytoskeleton         |
| 4  | Actin, aortic smooth muscle (ACTA2)                   | P62739 | 42,009/5.2  | 61.3 | O    | O | O | Skeletal muscle fiber development                                | ATP binding                                    |
| 5  | Vimentin (VIM)                                        | P48616 | 53,728/5.1  | 62.9 | X    | X | O | Muscle filament sliding                                          | Structural constituent of cytoskeleton         |
| 6  |                                                       |        |             | 63.7 | O    | X | O |                                                                  |                                                |
| 7  | Ras protein activator like 3 (RASAL3)                 | A6QQ91 | 110,756/9.2 | 28.9 | X    | O | O | Negative regulation of Ras protein signal transduction           | Ras GTPase activator activity                  |
| 8  | Tropomyosin beta chain (TPM2)                         | Q5KR48 | 32,837/4.7  | 41.2 | X    | X | O | Muscle contraction                                               | Structural constituent of muscle               |
| 9  | ATP synthase subunit beta, mitochondrial (ATP5B)      | P00829 | 53,728/5.1  | 41.9 | O    | O | X | Positive regulation of blood vessel endothelial cell migration   | ATPase activity                                |
| 10 | Ras GTPase activating protein 3 (RASA3)               | Q28013 | 95,386/7.6  | 31.2 | O    | O | X | Negative regulation of Ras protein signal transduction           | Ras GTPase activator activity                  |
| 11 |                                                       |        |             | 36.2 | O    | O | X |                                                                  |                                                |
| 12 | Actin, aortic smooth muscle (ACTA2)                   | P62739 | 42,009/5.2  | 39.8 | O    | O | O | Skeletal muscle fiber development                                | ATP binding                                    |
| 13 |                                                       |        |             | 39.8 | O    | O | O |                                                                  |                                                |
| 14 | Triosephosphate isomerase (TPI1)                      | Q5E956 | 26,690/6.4  | 66.3 | X    | X | O | Glycolytic process                                               | Triose-phosphate isomerase activity            |
| 15 | Glutathione S-transferase A1 (GSTA1)                  | Q28035 | 25,452/8.7  | 45.9 | O    | O | O | Glutathione metabolic process                                    | Glutathione transferase activity               |
| 16 | Ras-GEF domain-containing family member 1B (RASGEF1B) | A4IFE4 | 55,128/8.4  | 35.2 | O    | O | X | Positive regulation of Ras protein signal transduction           | Ras guanyl-nucleotide exchange factor activity |
| 17 | Glutathione S-transferase A1 (GSTA1)                  | Q28035 | 25,452/8.7  | 34.2 | O    | O | X | Glutathione metabolic process                                    | Glutathione transferase activity               |
| 18 | Retinal dehydrogenase 1 (ALDH1A1)                     | P48644 | 54,806/6.2  | 41.1 | O    | O | X | Oxidation-reduction process                                      | Aldehyde dehydrogenase (NAD) activity          |
| 19 | Switch-associated protein 70 (SWAP70)                 | P0C1G6 | 68,921/5.8  | 5.3  | O    | O | X | Negative regulation of actin filament depolymerization           | DNA binding                                    |
| 20 | Alpha-enolase (ENO1)                                  | Q9XSJ4 | 47,327/6.4  | 49.3 | X    | O | X | Glycolytic process                                               | Magnesium ion binding                          |
| 21 |                                                       |        |             |      | X    | O | X |                                                                  |                                                |
| 22 | Rab GDP dissociation inhibitor beta (GDI2)            | P50397 | 50,489/5.9  | 50.3 | O    | O | X | Small GTPase mediated signal transduction                        | Rab GDP-dissociation inhibitor activity        |
| 23 |                                                       |        |             |      | 40.4 | O | O |                                                                  |                                                |
| 24 | Superoxide dismutase [Cu-Zn] (SOD1)                   | P00442 | 15,683/5.9  | 44.1 | O    | O | X | Reactive oxygen species metabolic process,                       | Superoxide dismutase activity                  |
| 25 | Transitional endoplasmic reticulum ATPase (VCP)       | Q3ZBT1 | 89,331/5.1  | 45.8 | O    | O | O | Endoplasmic reticulum stress-induced pre-emptive quality control | ATPase activity, ATP binding                   |
| 26 | Actin, aortic smooth muscle (ACTA2)                   | P62739 | 42,009/5.2  | 29.7 | O    | O | X | Skeletal muscle fiber development                                | ATP binding                                    |
| 27 | Serum albumin (ALB)                                   | P02769 | 69,294/5.8  | 30.1 | O    | O | O | Cellular protein metabolic process                               | DNA, chaperone, fatty acid, copper ion binding |

624 <sup>a</sup> Spot number correspond to labels in Fig 2, <sup>b</sup> MW, molecular weight (Da), <sup>c</sup> pI, Isoelectric point, <sup>d</sup> Cov., sequence  
625 coverage, <sup>e</sup> Proliferation phase, <sup>e</sup> Secretion phase, <sup>e</sup> Regression phase

626

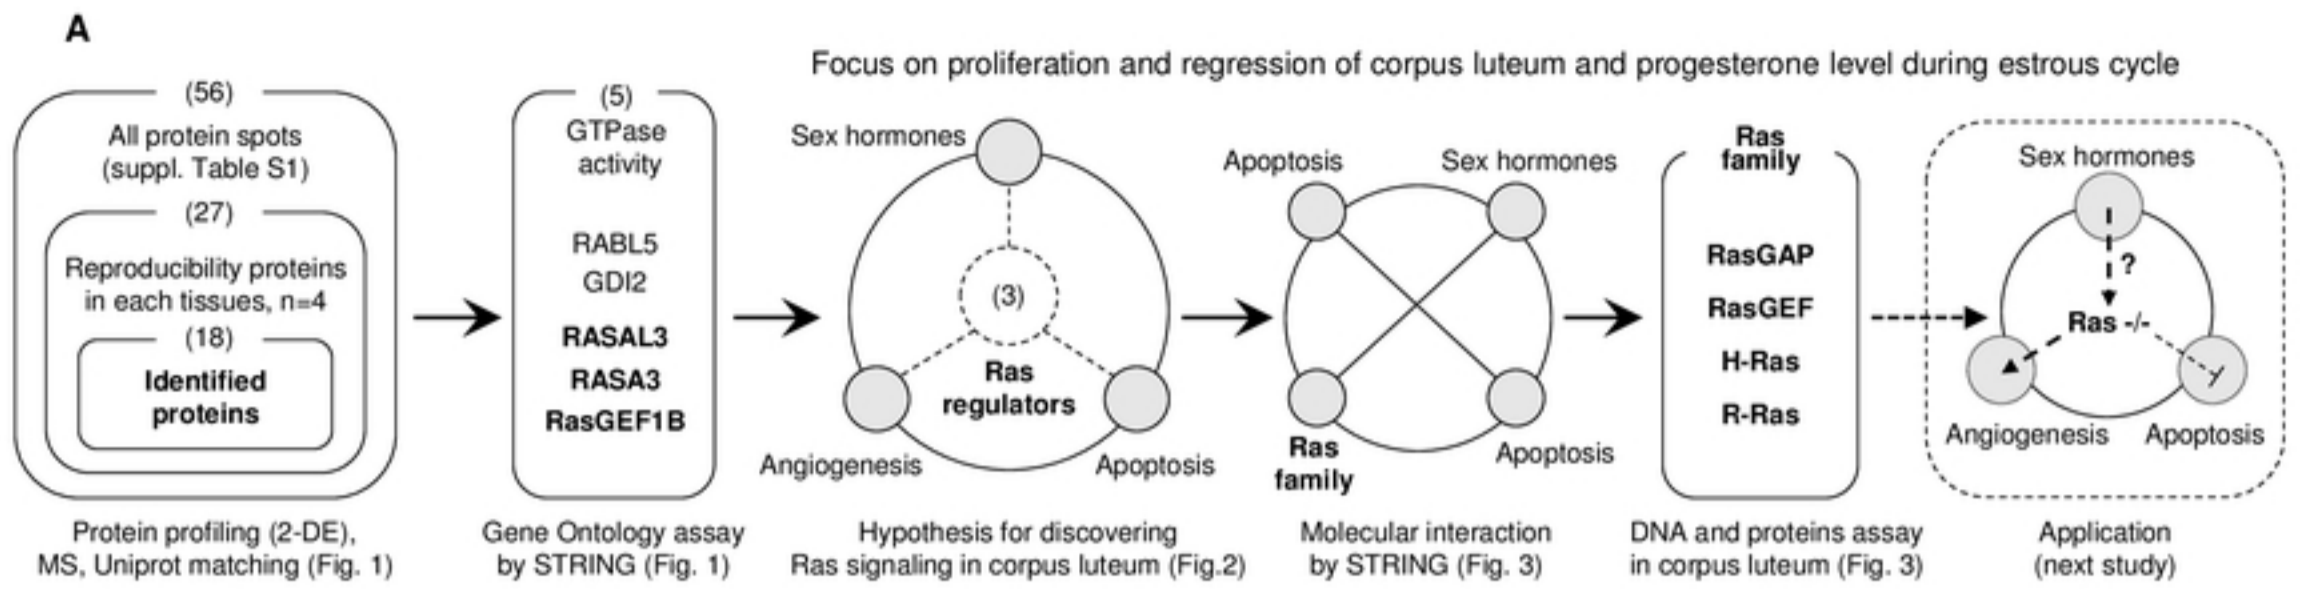

bioRxiv preprint doi: <https://doi.org/10.1101/625186>; this version posted May 1, 2019. The copyright holder for this preprint (which was not certified by peer review) is the author/funder, who has granted bioRxiv a license to display the preprint in perpetuity. It is made available under aCC-BY 4.0 International license.

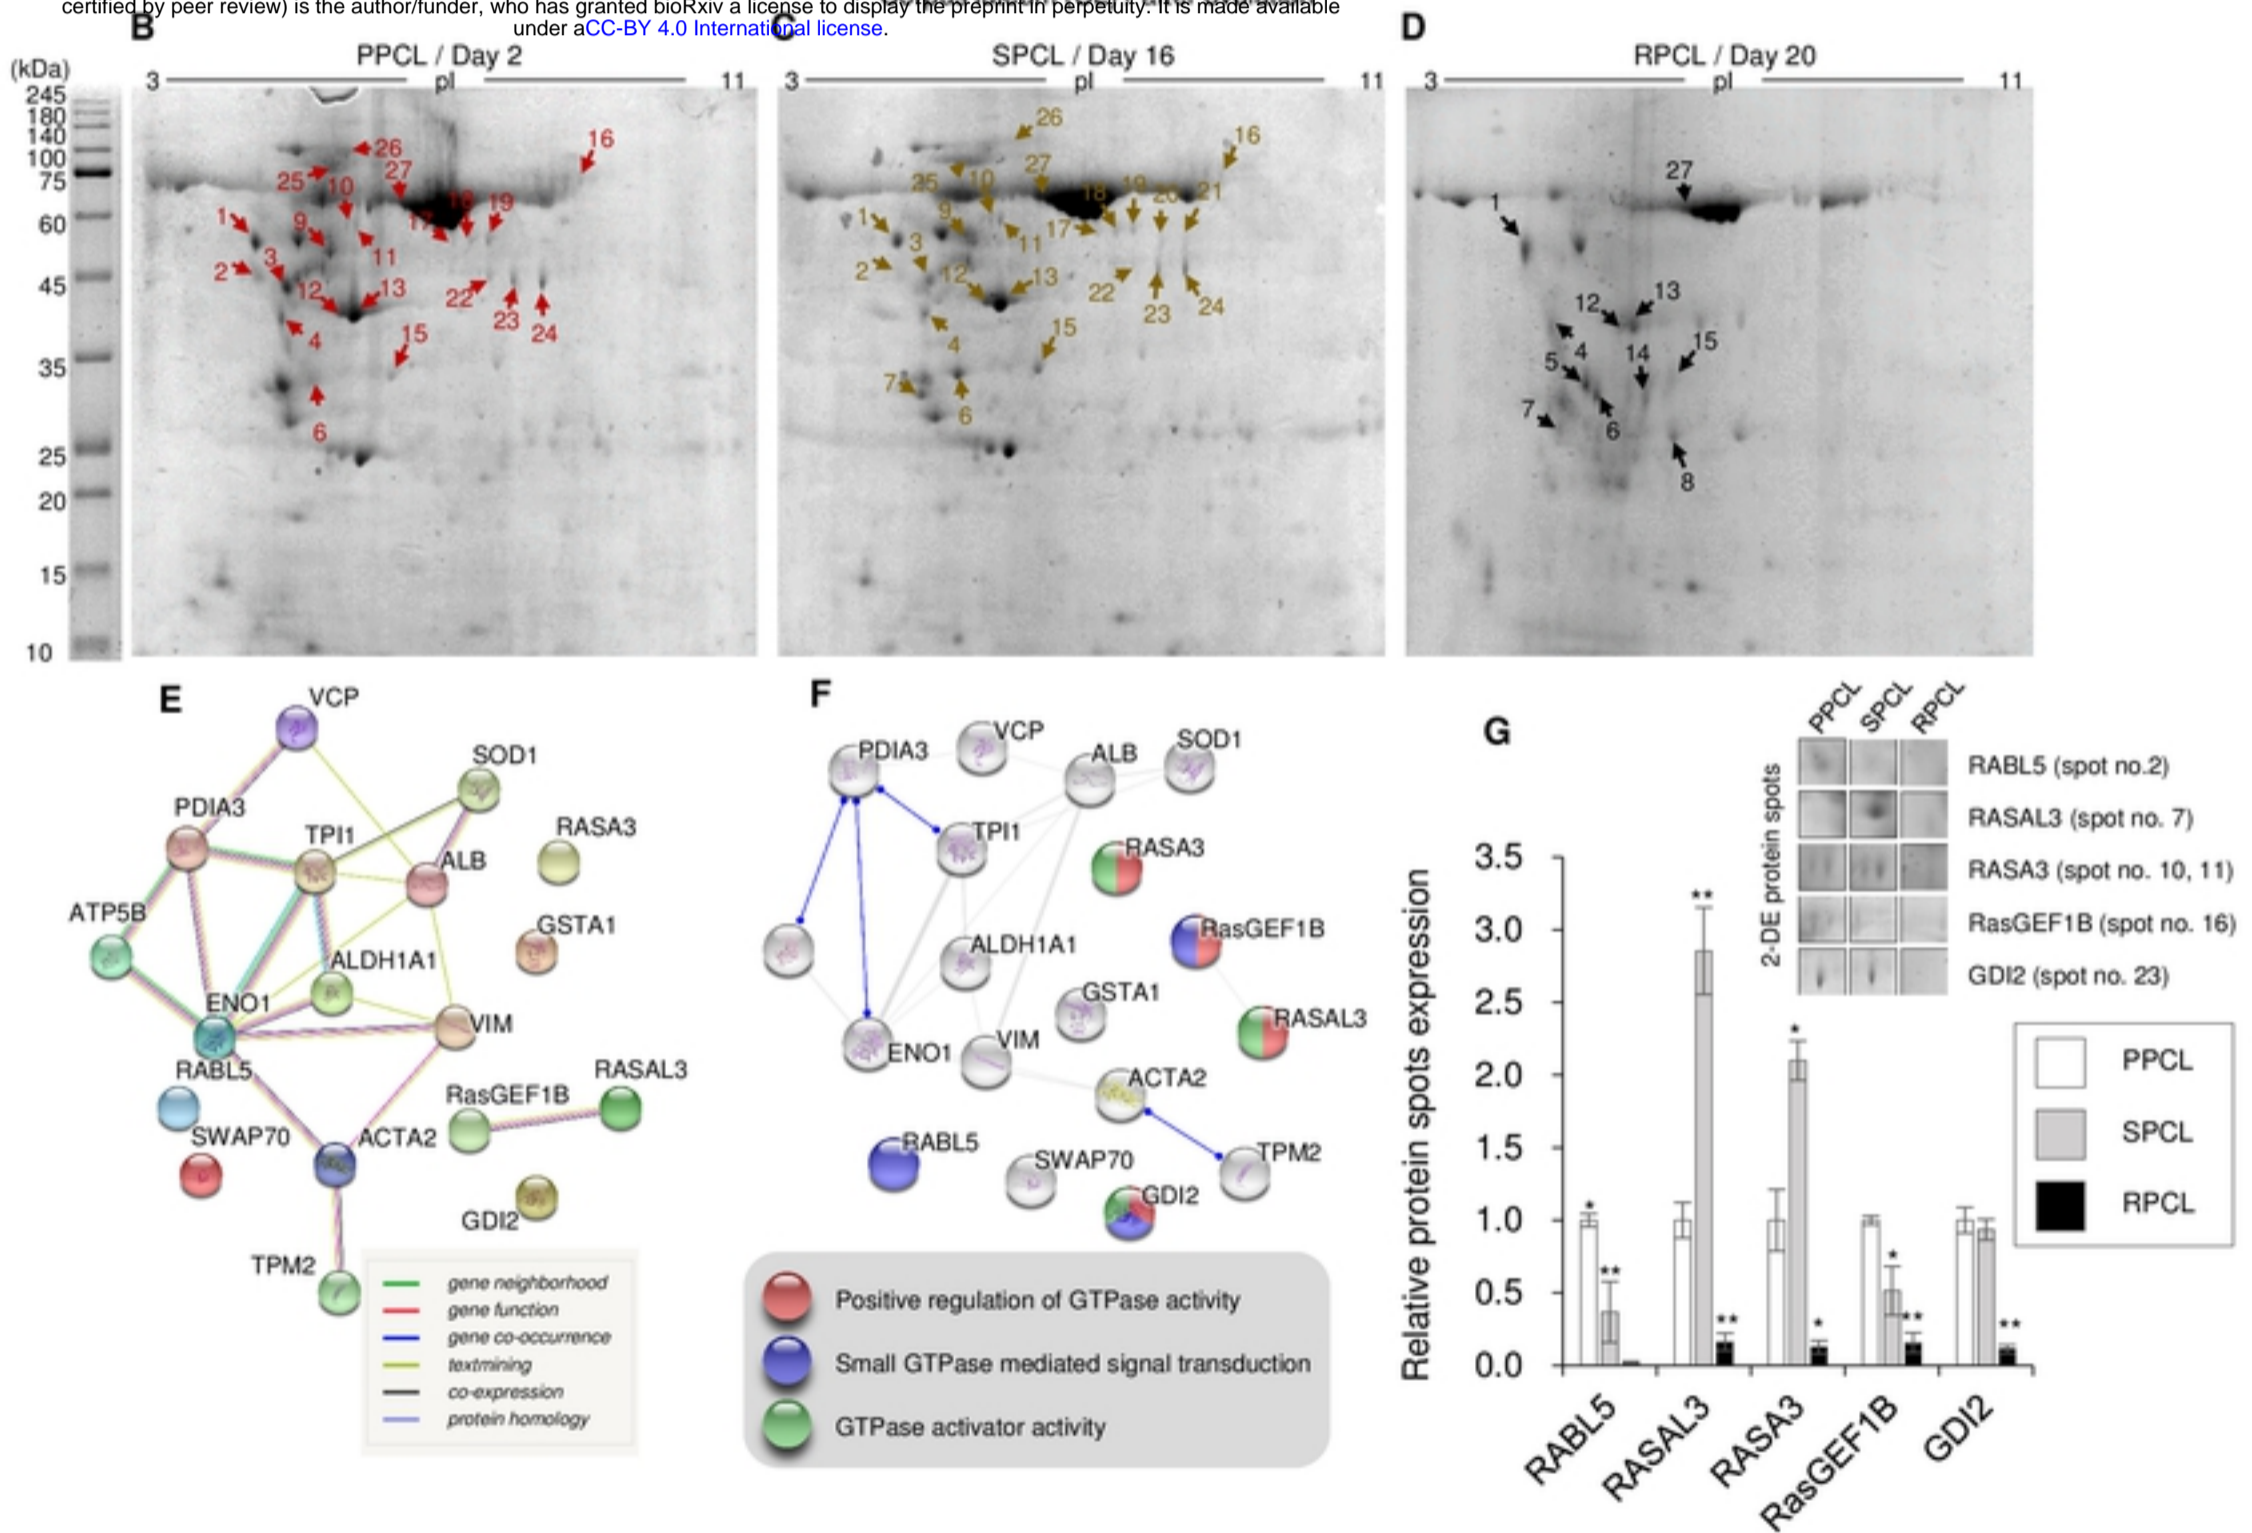

Figure 1

bioRxiv preprint doi: <https://doi.org/10.1101/625186>; this version posted May 1, 2019. The copyright holder for this preprint (which was not certified by peer review) is the author/funder, who has granted bioRxiv a license to display the preprint in perpetuity. It is made available under aCC-BY 4.0 International license.

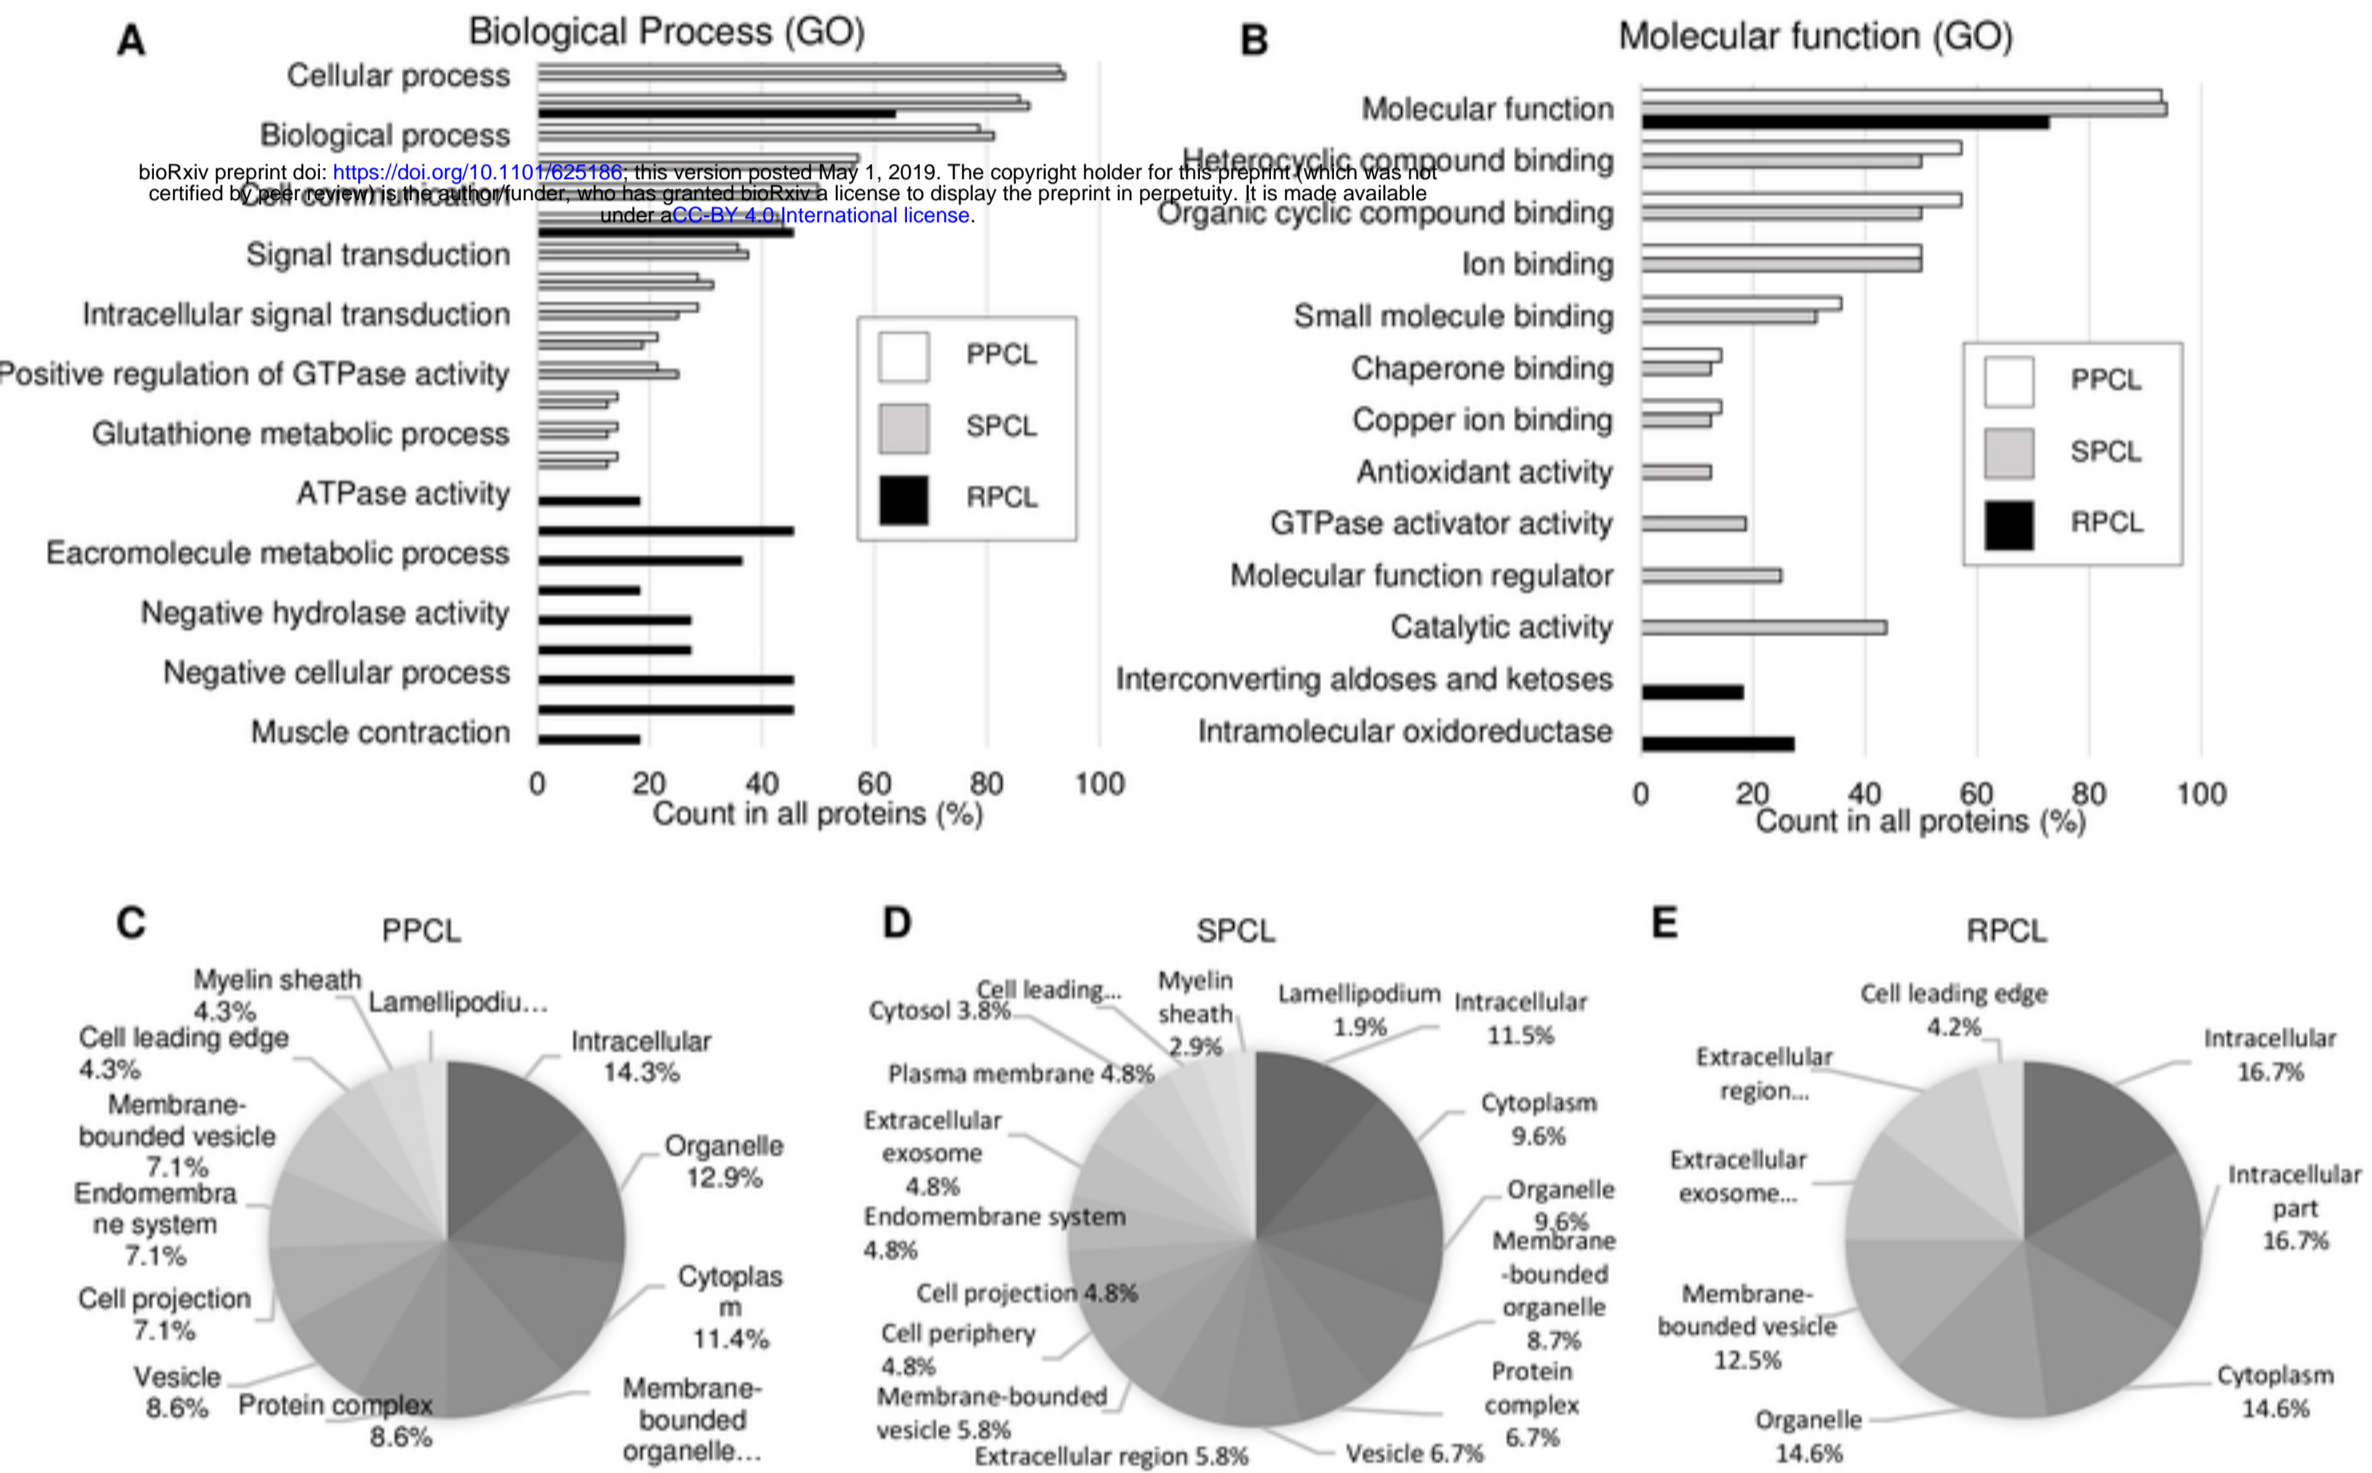

Figure 2

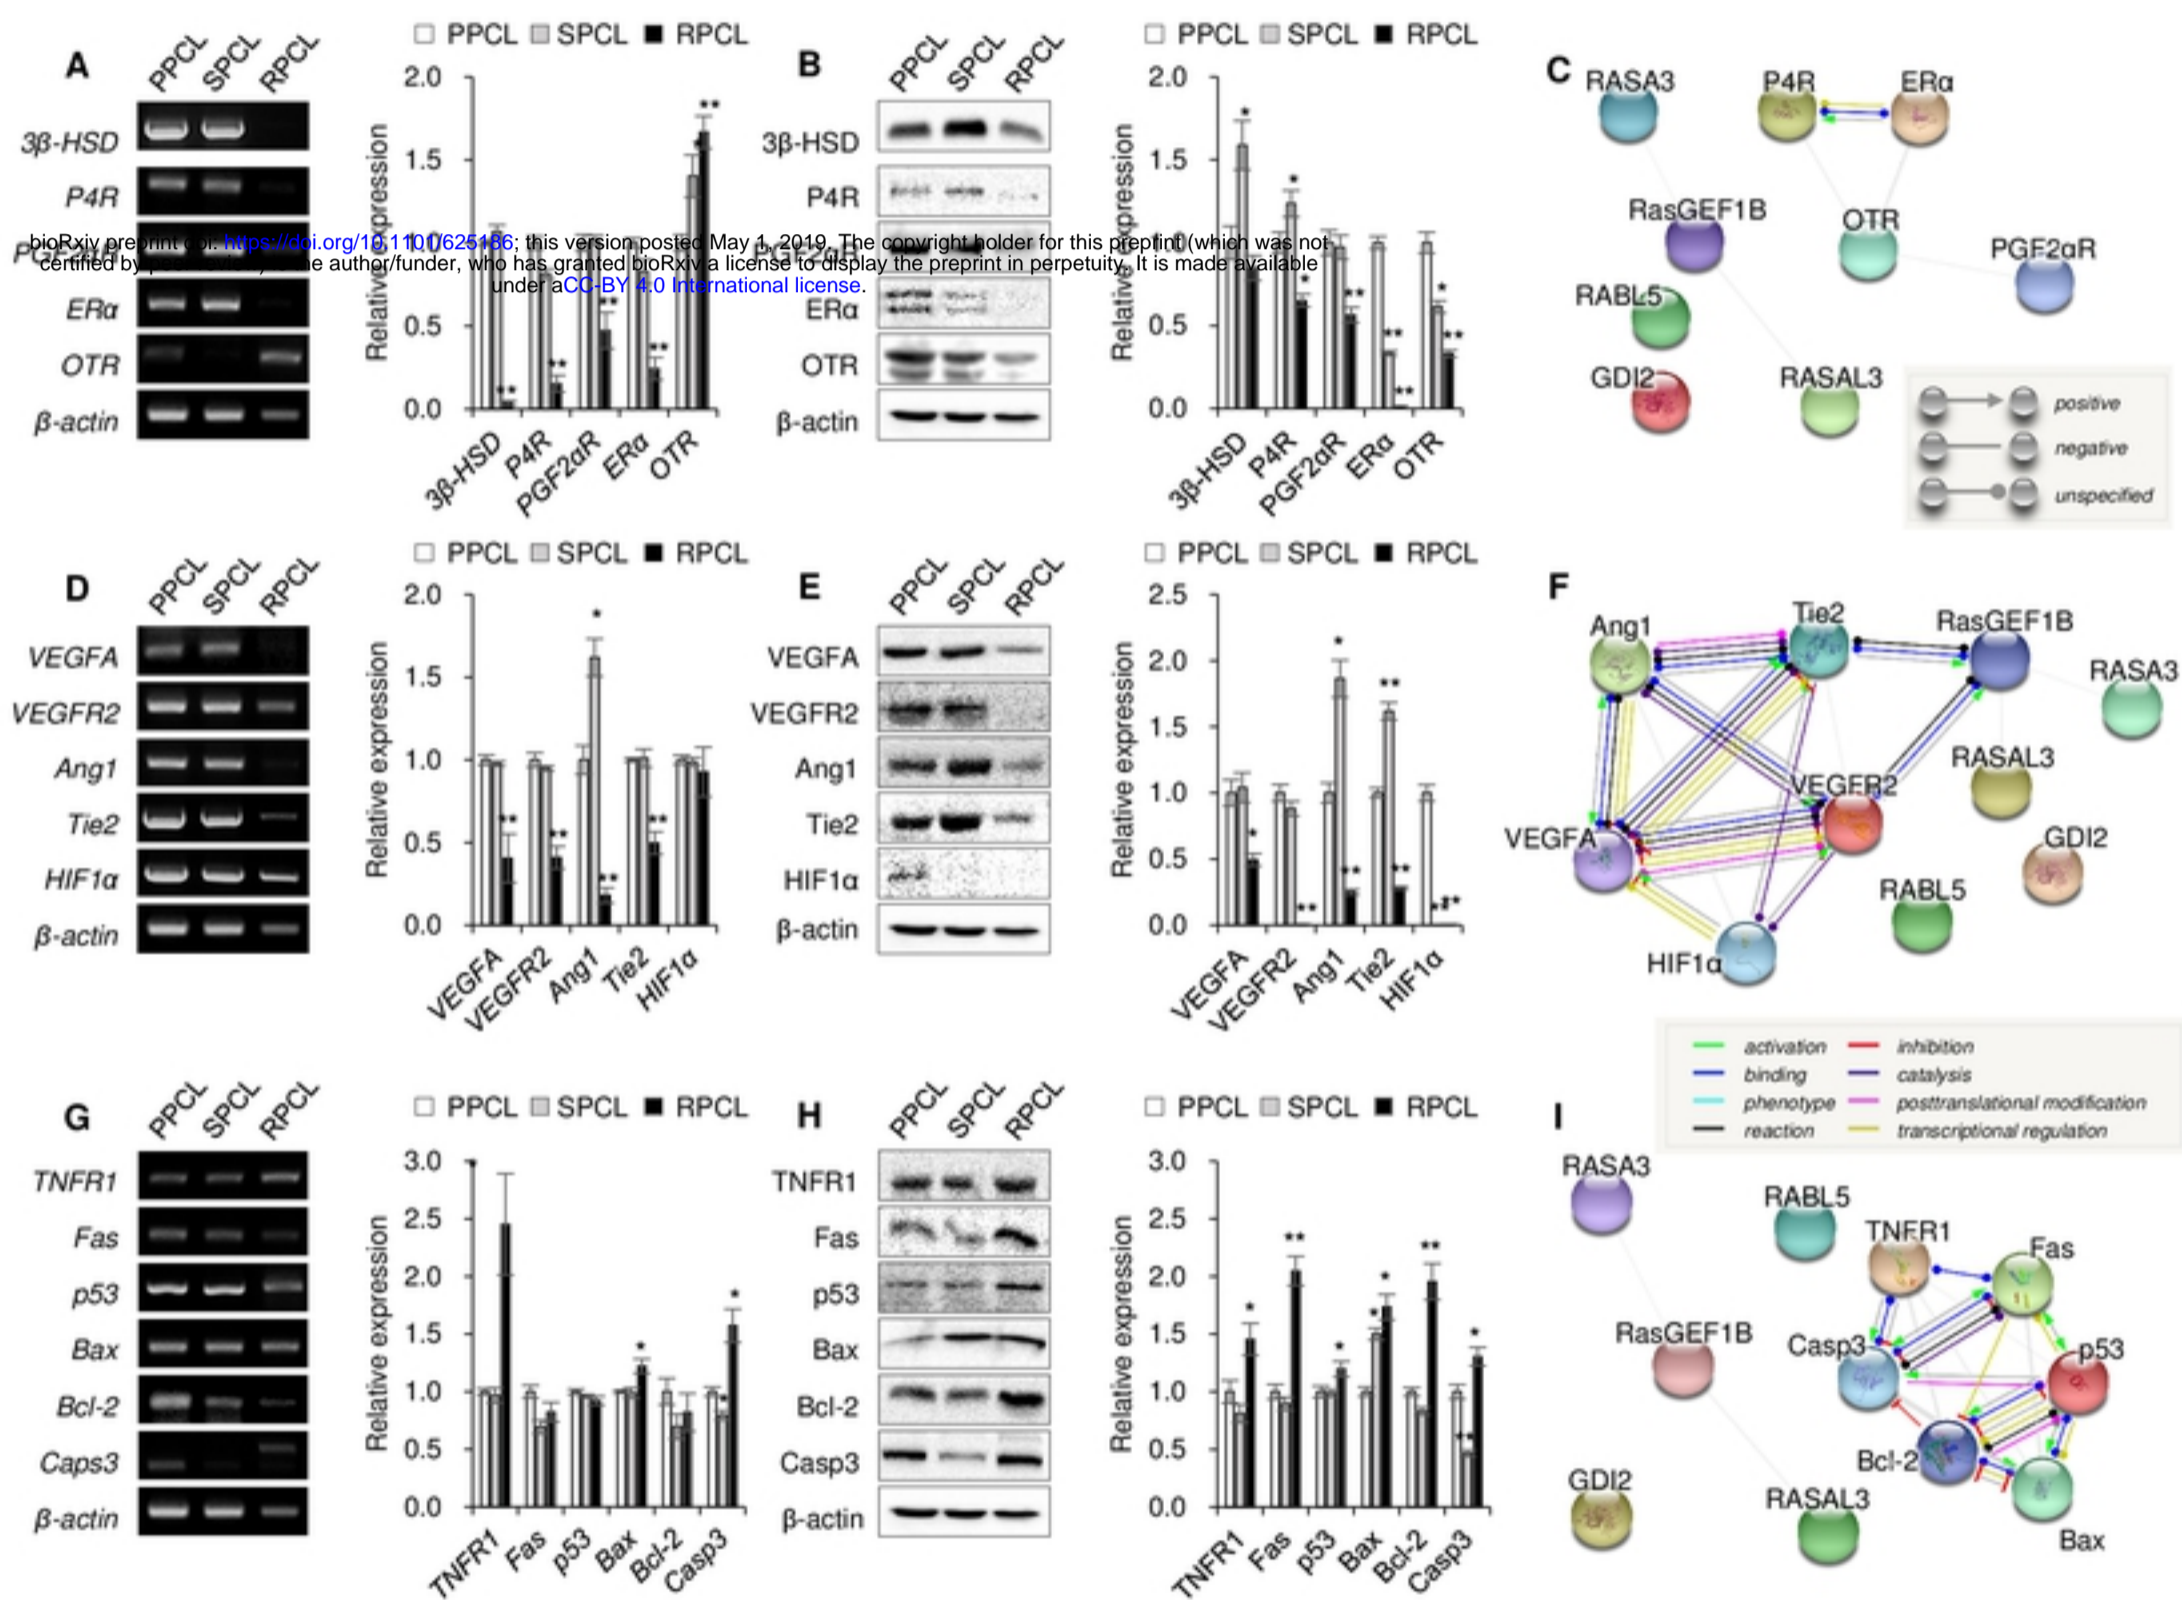

Figure 3

bioRxiv preprint doi: <https://doi.org/10.1101/625186>; this version posted May 1, 2019. The copyright holder for this preprint (which was not certified by peer review) is the author/funder, who has granted bioRxiv a license to display the preprint in perpetuity. It is made available under aCC-BY 4.0 International license.

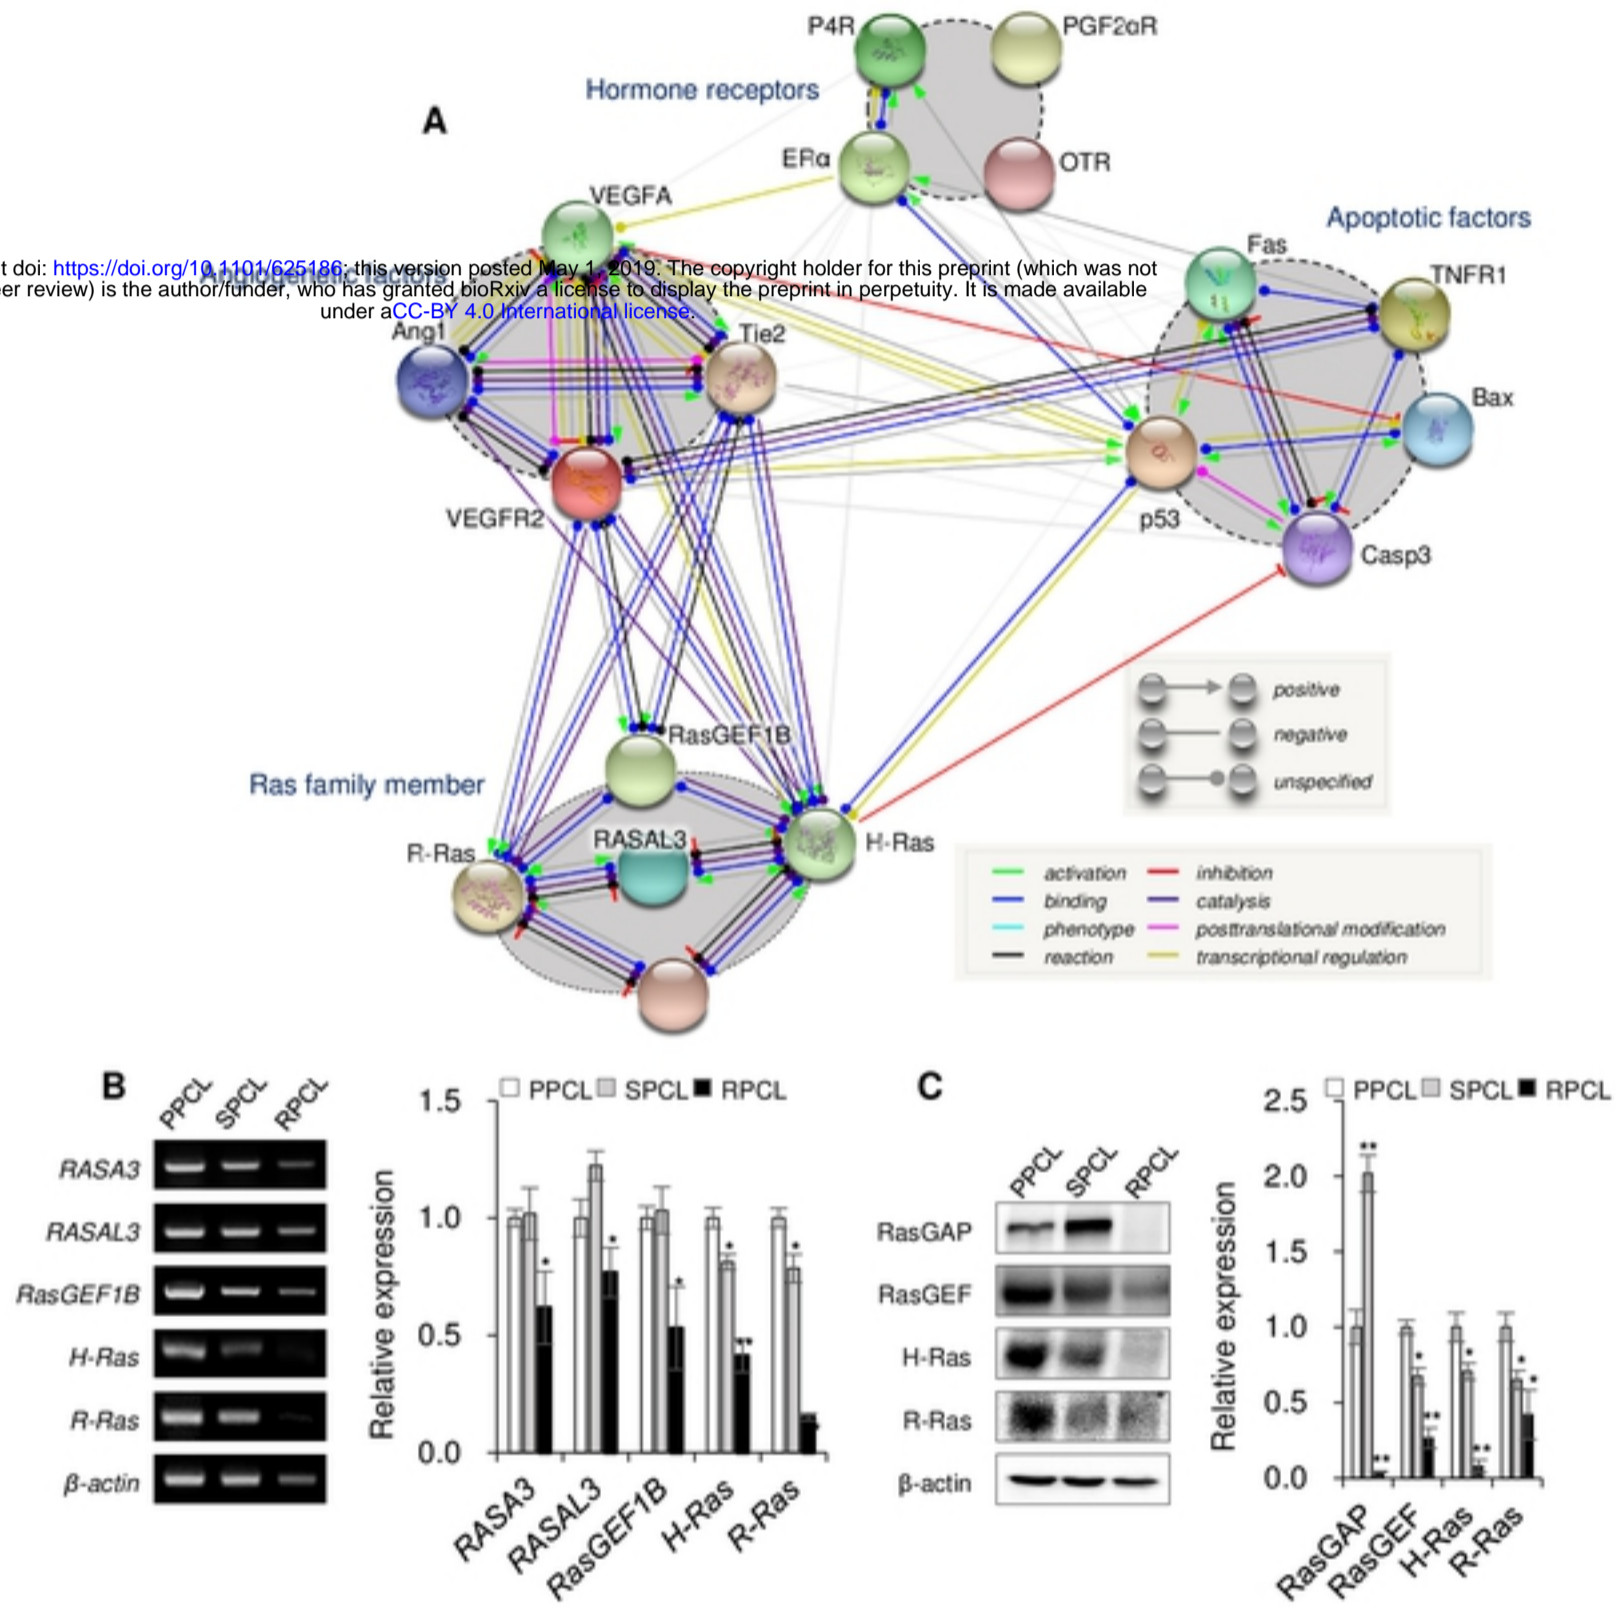

Figure 4

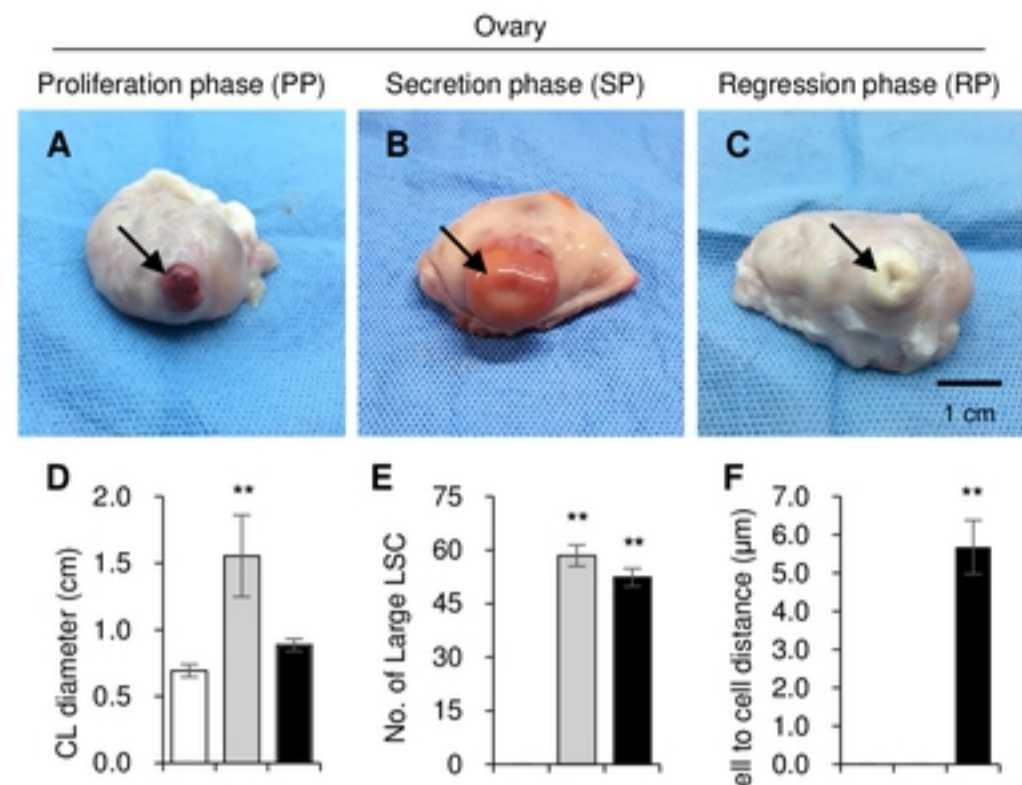

bioRxiv preprint doi: <https://doi.org/10.1101/625186>; this version posted May 1, 2019. The copyright holder for this preprint (which was not certified by peer review) is the author/funder, who has granted bioRxiv a license to display the preprint in perpetuity. It is made available under aCC-BY 4.0 International license.

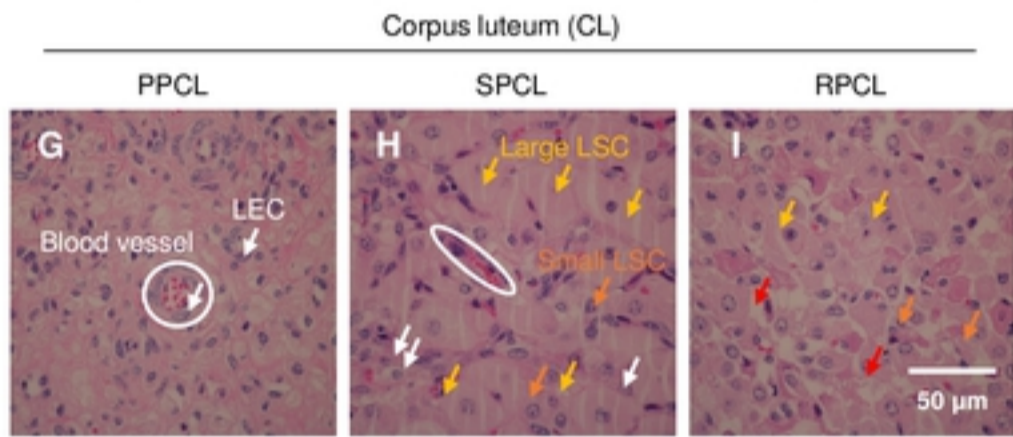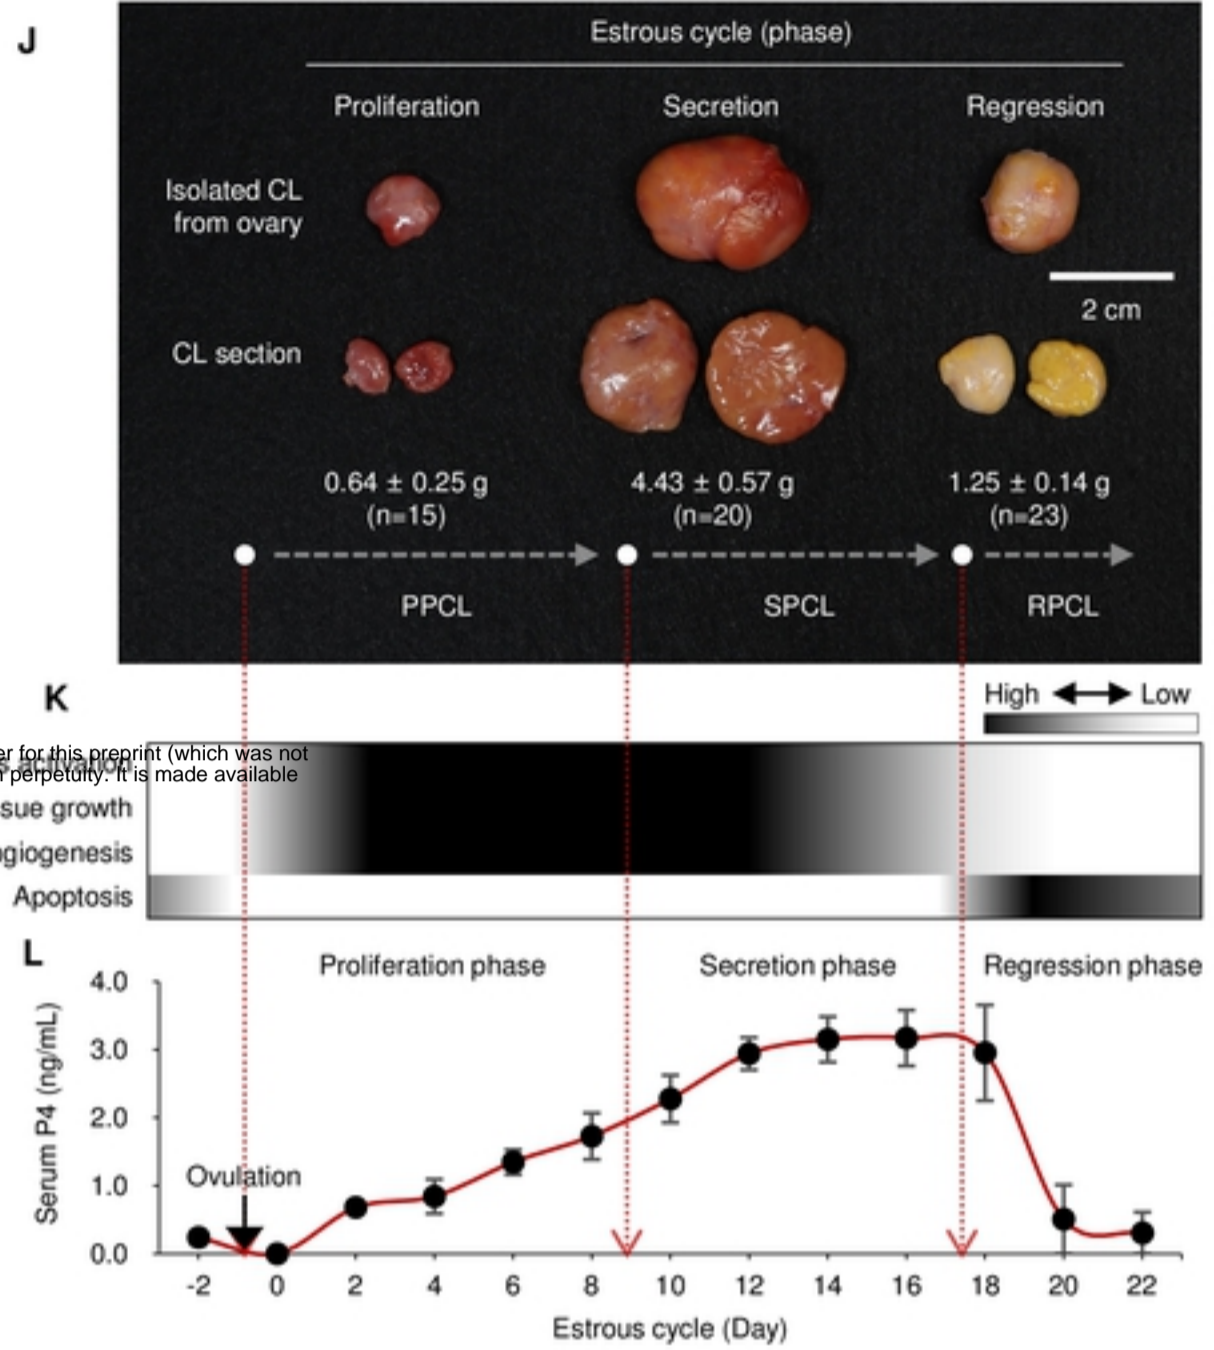

Figure 5
